# Supplementary material for: Donor–acceptor naphthalimides and peryleneimides for all-solution-processed thin film lasers
Source: Royal Society of Chemistry journal article supplement (doi:10.1039/d2tc03081k), 2022-01-01
Supplement: d2tc03081k1.pdf [file d2tc03081k1.pdf]

## Supporting Information

### Donor-Acceptor naphthalimides and peryleneimides for all-solution-processed thin film lasers

Beatriz Donoso,<sup>†a</sup> Víctor Bonal,<sup>†b</sup> Iván Torres-Moya,<sup>a</sup> Pedro G. Boj,<sup>c</sup> José A. Quintana,<sup>c</sup> José M. Villalvilla,<sup>b</sup> Jesús Herrera,<sup>a</sup> Pilar Prieto,<sup>\*a</sup> and María A. Díaz-García<sup>\*b</sup>

<sup>a</sup> Department of Inorganic, Organic Chemistry and Biochemistry, Faculty of Science and Chemical Technologies, University of Castilla-La Mancha-IRICA, Ciudad Real, 13071, Spain. Email: mariapilar.prieto@uclm.es

<sup>b</sup> Departamento de Física Aplicada and Instituto Universitario de Materiales de Alicante, Universidad de Alicante, Alicante, 03080, Spain. Email: maria.diaz@ua.es

<sup>c</sup> Departamento de Óptica, Farmacología y Anatomía and Instituto Universitario de Materiales de Alicante, Universidad de Alicante, Alicante, 03080, Spain.

<sup>†</sup> These authors contributed equally to this work.

#### Table of contents:

|                                                                                                                                                                                     |    |
|-------------------------------------------------------------------------------------------------------------------------------------------------------------------------------------|----|
| <b>Fig. S1.</b> UV-Vis absorption and emission spectra in CHCl <sub>3</sub> .....                                                                                                   | 2  |
| <b>Fig. S2.</b> UV-Vis absorption and emission spectra in toluene ( <b>PI 1-3</b> ).....                                                                                            | 2  |
| <b>Table S1.</b> Cartesian coordinates for optimized geometry of <b>NI1</b> .....                                                                                                   | 3  |
| <b>Table S2.</b> Cartesian coordinates for optimized geometry of <b>NI2</b> .....                                                                                                   | 4  |
| <b>Table S3.</b> Cartesian coordinates for optimized geometry of <b>NI3</b> .....                                                                                                   | 6  |
| <b>Table S4.</b> Cartesian coordinates for optimized geometry of <b>PI1</b> .....                                                                                                   | 7  |
| <b>Table S5.</b> Cartesian coordinates for optimized geometry of <b>PI2</b> .....                                                                                                   | 9  |
| <b>Table S6.</b> Cartesian coordinates for optimized geometry of <b>PI3</b> .....                                                                                                   | 11 |
| <b>Fig. S3.</b> Theoretical UV-Vis absorption and emission spectra.....                                                                                                             | 13 |
| <b>Table S7.</b> Electronic transitions associated with the absorption of compounds <b>NI</b> .....                                                                                 | 14 |
| <b>Table S8.</b> Electronic transitions associated with the absorption of compounds <b>PI</b> .....                                                                                 | 15 |
| <b>Fig. S4.</b> Optical properties of PS films doped with 1wt% of <b>NI3</b> .....                                                                                                  | 16 |
| <b>Fig. S5.</b> Photoluminescence intensity in thin film for different concentrations.....                                                                                          | 16 |
| <b>Fig. S6.</b> Amplified spontaneous emission (ASE) threshold determination.....                                                                                                   | 17 |
| <b>Table S9.</b> Optical and ASE properties of PS films doped with <b>NI</b> and <b>PI</b> derivatives.....                                                                         | 18 |
| <b>Table S10.</b> ASE properties comparison with other small molecules.....                                                                                                         | 20 |
| <b>Table S11.</b> Geometrical and performance parameters of top-layer resonator distributed feedback (DFB) lasers based on <b>NI</b> and <b>PI</b> derivatives as active media..... | 21 |
| <b>Fig. S7-S12.</b> NMR spectra of <b>PI</b> derivatives.....                                                                                                                       | 22 |

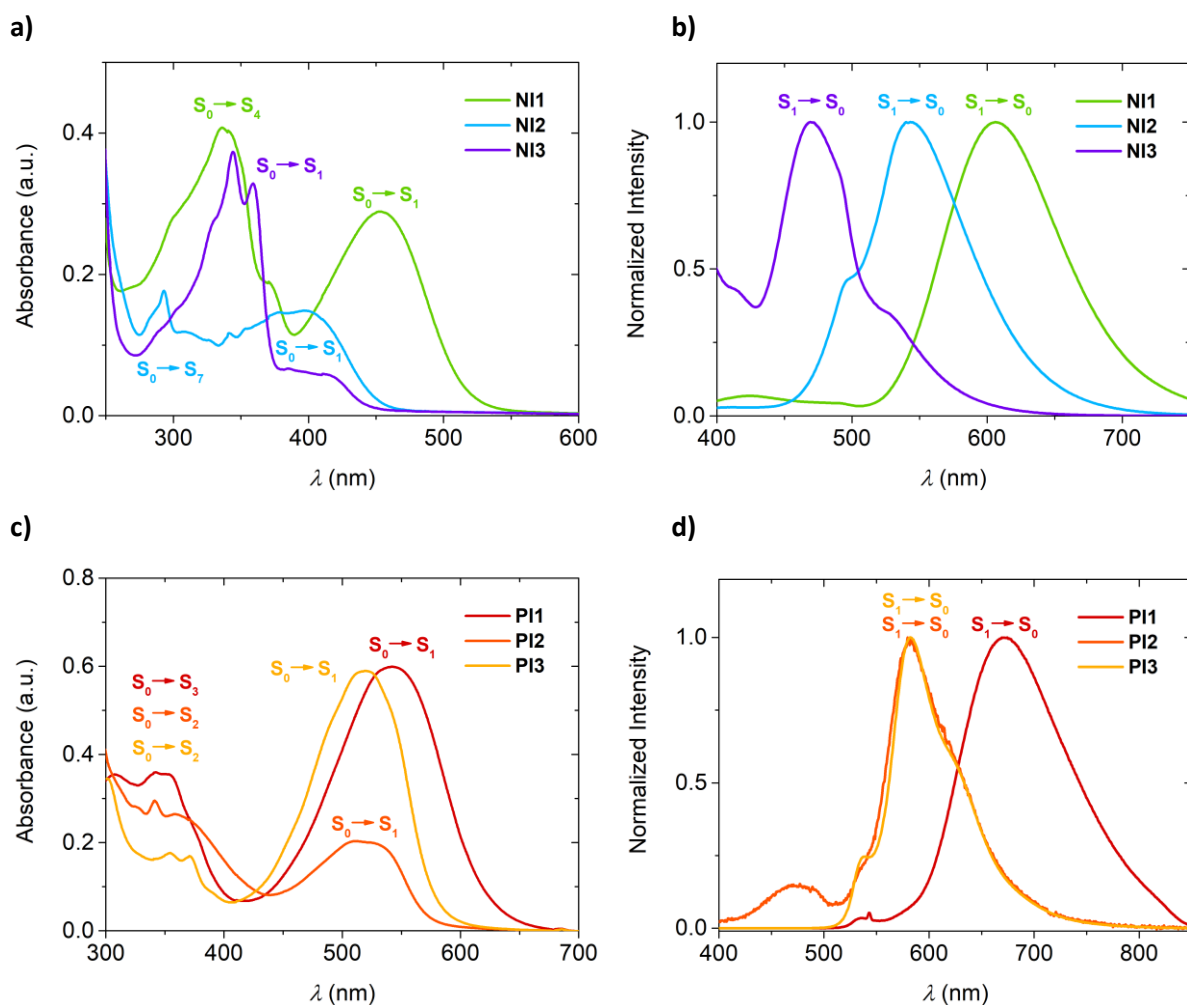

**Fig. S1.** UV/Visible absorption (left column, a and c) and emission (right column, b and d) spectra of NI derivatives (top row, a and b) and PI derivatives (bottom row, c and d). The measurements conditions were the same for every derivative (298 K,  $\text{CHCl}_3$ ,  $1 \times 10^{-5}$  M).

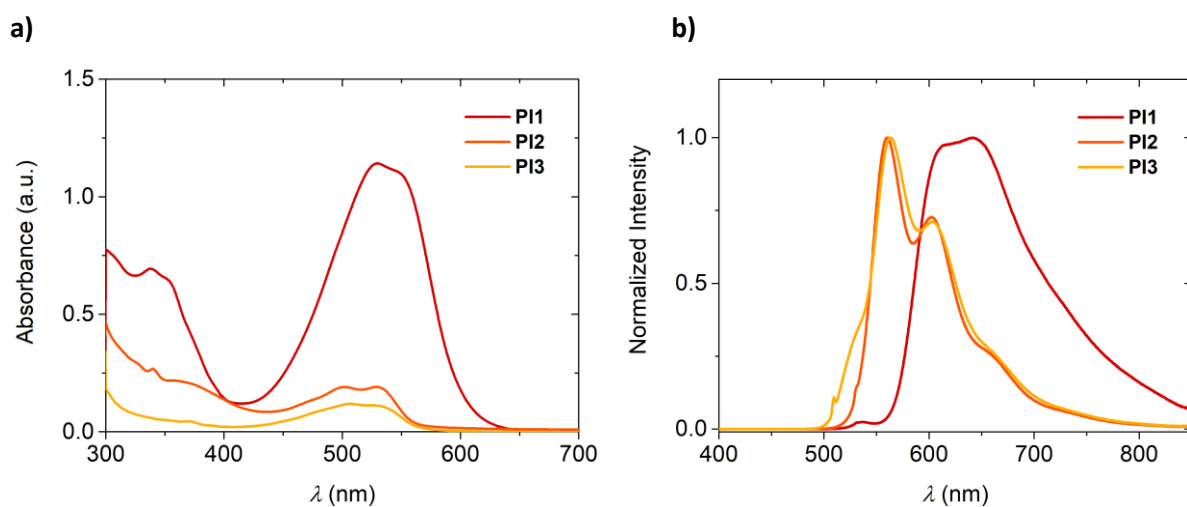

**Fig. S2.** UV/Visible absorption (a) and emission (b) spectra of PI derivatives using toluene as solvent (298 K,  $1 \times 10^{-5}$  M).

**Table S1.** Cartesian coordinates for optimized geometry of **NI1**

| Center number | Atomic number | Atomic type | Coordinates (Angstroms) |           |           |
|---------------|---------------|-------------|-------------------------|-----------|-----------|
|               |               |             | X                       | Y         | Z         |
| 1             | 6             | 0           | 5.011826                | -1.940847 | 0.173861  |
| 2             | 6             | 0           | 3.545474                | -1.948615 | -0.057708 |
| 3             | 6             | 0           | 2.723100                | -0.940297 | 0.507803  |
| 4             | 6             | 0           | 3.298096                | 0.085083  | 1.299750  |
| 5             | 6             | 0           | 4.757404                | 0.119233  | 1.548952  |
| 6             | 6             | 0           | 2.989524                | -2.949729 | -0.834336 |
| 7             | 6             | 0           | 1.315681                | -0.963870 | 0.271652  |
| 8             | 6             | 0           | 0.781573                | -2.004827 | -0.526448 |
| 9             | 6             | 0           | 1.601021                | -2.976226 | -1.067130 |
| 10            | 6             | 0           | 0.499347                | 0.070551  | 0.853864  |
| 11            | 6             | 0           | 1.106587                | 1.063000  | 1.627645  |
| 12            | 6             | 0           | 2.490484                | 1.069660  | 1.846344  |
| 13            | 1             | 0           | 2.955178                | 1.843956  | 2.447031  |
| 14            | 1             | 0           | 0.487445                | 1.839534  | 2.063230  |
| 15            | 1             | 0           | 3.646751                | -3.704128 | -1.252922 |
| 16            | 1             | 0           | 1.174412                | -3.766476 | -1.676811 |
| 17            | 1             | 0           | -0.288315               | -2.023566 | -0.705646 |
| 18            | 6             | 0           | -0.903735               | 0.090941  | 0.649914  |
| 19            | 6             | 0           | -2.111157               | 0.124362  | 0.484975  |
| 20            | 7             | 0           | 5.520184                | -0.917741 | 0.987693  |
| 21            | 6             | 0           | 6.974393                | -0.901778 | 1.232327  |
| 22            | 6             | 0           | 7.741921                | -0.102566 | 0.174150  |
| 23            | 1             | 0           | 7.304363                | -1.941425 | 1.237327  |
| 24            | 1             | 0           | 7.122513                | -0.464851 | 2.220691  |
| 25            | 6             | 0           | 9.251855                | -0.096143 | 0.440213  |
| 26            | 1             | 0           | 7.540764                | -0.537096 | -0.812347 |
| 27            | 1             | 0           | 7.362347                | 0.926155  | 0.163405  |
| 28            | 6             | 0           | 10.046376               | 0.696758  | -0.604872 |
| 29            | 1             | 0           | 9.444612                | 0.324074  | 1.437468  |
| 30            | 1             | 0           | 9.621494                | -1.130971 | 0.467786  |
| 31            | 1             | 0           | 9.851314                | 0.277613  | -1.602090 |
| 32            | 1             | 0           | 9.675619                | 1.731121  | -0.633027 |
| 33            | 6             | 0           | 11.557851               | 0.706806  | -0.346105 |
| 34            | 6             | 0           | 12.353793               | 1.498653  | -1.390532 |
| 35            | 1             | 0           | 11.927592               | -0.328158 | -0.316721 |
| 36            | 1             | 0           | 11.752208               | 1.125386  | 0.651759  |
| 37            | 6             | 0           | 13.865615               | 1.509061  | -1.133117 |
| 38            | 1             | 0           | 12.159885               | 1.080686  | -2.388882 |
| 39            | 1             | 0           | 11.984928               | 2.534046  | -1.420410 |
| 40            | 6             | 0           | 14.652961               | 2.301792  | -2.180701 |
| 41            | 1             | 0           | 14.059456               | 1.927140  | -0.135888 |
| 42            | 1             | 0           | 14.234220               | 0.474605  | -1.103742 |
| 43            | 1             | 0           | 15.727217               | 2.290117  | -1.969230 |
| 44            | 1             | 0           | 14.507345               | 1.885854  | -3.184213 |
| 45            | 1             | 0           | 14.331308               | 3.349154  | -2.209225 |
| 46            | 6             | 0           | -3.517840               | 0.178951  | 0.303293  |

|    |   |   |            |           |           |
|----|---|---|------------|-----------|-----------|
| 47 | 6 | 0 | -4.283211  | 1.213047  | 0.882609  |
| 48 | 6 | 0 | -4.195213  | -0.795140 | -0.459671 |
| 49 | 6 | 0 | -5.657662  | 1.268216  | 0.712764  |
| 50 | 1 | 0 | -3.784772  | 1.967187  | 1.482827  |
| 51 | 6 | 0 | -5.568250  | -0.736579 | -0.640272 |
| 52 | 1 | 0 | -3.626797  | -1.594298 | -0.924312 |
| 53 | 6 | 0 | -6.328396  | 0.295492  | -0.055054 |
| 54 | 1 | 0 | -6.225624  | 2.064737  | 1.179628  |
| 55 | 1 | 0 | -6.064136  | -1.489024 | -1.242703 |
| 56 | 7 | 0 | -7.724892  | 0.353307  | -0.233242 |
| 57 | 6 | 0 | -8.396627  | 1.609915  | -0.298351 |
| 58 | 6 | 0 | -7.890340  | 2.648893  | -1.094066 |
| 59 | 6 | 0 | -9.581979  | 1.814389  | 0.423289  |
| 60 | 6 | 0 | -8.553996  | 3.872816  | -1.152869 |
| 61 | 1 | 0 | -6.979675  | 2.490764  | -1.662234 |
| 62 | 6 | 0 | -10.248309 | 3.035738  | 0.344051  |
| 63 | 1 | 0 | -9.974366  | 1.013311  | 1.040749  |
| 64 | 6 | 0 | -9.737167  | 4.072629  | -0.438802 |
| 65 | 1 | 0 | -8.150659  | 4.668171  | -1.772815 |
| 66 | 1 | 0 | -11.165146 | 3.180006  | 0.908130  |
| 67 | 1 | 0 | -10.255419 | 5.024921  | -0.492985 |
| 68 | 6 | 0 | -8.491119  | -0.843787 | -0.352387 |
| 69 | 6 | 0 | -8.287536  | -1.912053 | 0.534370  |
| 70 | 6 | 0 | -9.469077  | -0.959037 | -1.351386 |
| 71 | 6 | 0 | -9.041737  | -3.077384 | 0.411581  |
| 72 | 1 | 0 | -7.539641  | -1.822259 | 1.315228  |
| 73 | 6 | 0 | -10.230743 | -2.121395 | -1.455097 |
| 74 | 1 | 0 | -9.627006  | -0.135284 | -2.039461 |
| 75 | 6 | 0 | -10.019163 | -3.188050 | -0.579447 |
| 76 | 1 | 0 | -8.873555  | -3.896220 | 1.105008  |
| 77 | 1 | 0 | -10.984600 | -2.196676 | -2.233317 |
| 78 | 1 | 0 | -10.609981 | -4.094477 | -0.667242 |
| 79 | 8 | 0 | 5.292496   | 0.999196  | 2.212934  |
| 80 | 8 | 0 | 5.757743   | -2.782770 | -0.311128 |

**Table S2.** Cartesian coordinates for optimized geometry of NI2

| Center number | Atomic number | Atomic type | Coordinates (Angstroms) |           |           |
|---------------|---------------|-------------|-------------------------|-----------|-----------|
|               |               |             | X                       | Y         | Z         |
| 1             | 6             | 0           | -2.895344               | -1.394409 | 0.071473  |
| 2             | 6             | 0           | -2.318696               | -0.556105 | 1.058233  |
| 3             | 6             | 0           | -3.136860               | 0.038224  | 2.053141  |
| 4             | 6             | 0           | -2.094393               | -1.970488 | -0.900592 |
| 5             | 6             | 0           | -0.914166               | -0.302572 | 1.055674  |
| 6             | 6             | 0           | -0.712518               | -1.735006 | -0.918894 |
| 7             | 6             | 0           | -0.377805               | 0.541992  | 2.058569  |
| 8             | 6             | 0           | -1.193182               | 1.109884  | 3.017325  |
| 9             | 6             | 0           | -2.579307               | 0.859721  | 3.016399  |
| 10            | 1             | 0           | -3.232694               | 1.299675  | 3.761886  |

|    |   |   |            |           |           |
|----|---|---|------------|-----------|-----------|
| 11 | 1 | 0 | -0.765521  | 1.754829  | 3.778412  |
| 12 | 1 | 0 | -2.560952  | -2.606482 | -1.644873 |
| 13 | 1 | 0 | -0.096999  | -2.193248 | -1.685189 |
| 14 | 7 | 0 | -5.111143  | -1.069910 | 1.086670  |
| 15 | 6 | 0 | -0.105323  | -0.915798 | 0.034797  |
| 16 | 1 | 0 | 0.689813   | 0.734868  | 2.058687  |
| 17 | 6 | 0 | -4.600705  | -0.211161 | 2.071659  |
| 18 | 8 | 0 | -5.341987  | 0.297535  | 2.902921  |
| 19 | 6 | 0 | -4.353717  | -1.661758 | 0.064418  |
| 20 | 8 | 0 | -4.887865  | -2.366255 | -0.783323 |
| 21 | 6 | 0 | -6.563058  | -1.331225 | 1.096840  |
| 22 | 1 | 0 | -6.704346  | -2.337445 | 0.700337  |
| 23 | 1 | 0 | -6.881120  | -1.299942 | 2.139679  |
| 24 | 6 | 0 | -7.351305  | -0.313207 | 0.266325  |
| 25 | 1 | 0 | -6.983621  | -0.338028 | -0.766475 |
| 26 | 1 | 0 | -7.156652  | 0.691561  | 0.660030  |
| 27 | 6 | 0 | -8.858096  | -0.596061 | 0.287878  |
| 28 | 1 | 0 | -9.044011  | -1.611035 | -0.090884 |
| 29 | 1 | 0 | -9.215748  | -0.587161 | 1.327203  |
| 30 | 6 | 0 | -9.673168  | 0.408430  | -0.536034 |
| 31 | 1 | 0 | -9.314407  | 0.399895  | -1.574965 |
| 32 | 1 | 0 | -9.484739  | 1.423398  | -0.158541 |
| 33 | 6 | 0 | -11.181616 | 0.132890  | -0.518218 |
| 34 | 1 | 0 | -11.369270 | -0.882818 | -0.894703 |
| 35 | 1 | 0 | -11.539418 | 0.140646  | 0.521268  |
| 36 | 6 | 0 | -11.997839 | 1.136607  | -1.341755 |
| 37 | 1 | 0 | -11.640003 | 1.128605  | -2.381292 |
| 38 | 1 | 0 | -11.809366 | 2.152372  | -0.965653 |
| 39 | 6 | 0 | -13.506500 | 0.862712  | -1.324116 |
| 40 | 1 | 0 | -13.865350 | 0.870980  | -0.284800 |
| 41 | 1 | 0 | -13.696024 | -0.152988 | -1.700225 |
| 42 | 6 | 0 | -14.323284 | 1.866027  | -2.147651 |
| 43 | 1 | 0 | -14.134218 | 2.880789  | -1.771676 |
| 44 | 1 | 0 | -13.965285 | 1.857237  | -3.186207 |
| 45 | 6 | 0 | -15.828769 | 1.585450  | -2.124390 |
| 46 | 1 | 0 | -16.223015 | 1.622434  | -1.102415 |
| 47 | 1 | 0 | -16.382943 | 2.317738  | -2.720618 |
| 48 | 1 | 0 | -16.052844 | 0.591109  | -2.527262 |
| 49 | 6 | 0 | 1.296682   | -0.696209 | -0.012461 |
| 50 | 6 | 0 | 2.500270   | -0.518435 | -0.068796 |
| 51 | 6 | 0 | 3.906218   | -0.321304 | -0.150413 |
| 52 | 6 | 0 | 4.660789   | -0.944719 | -1.165348 |
| 53 | 6 | 0 | 4.578123   | 0.499907  | 0.777711  |
| 54 | 6 | 0 | 6.032454   | -0.747009 | -1.253451 |
| 55 | 1 | 0 | 4.155393   | -1.571667 | -1.892152 |
| 56 | 6 | 0 | 5.952348   | 0.683804  | 0.699076  |
| 57 | 1 | 0 | 4.012841   | 0.978766  | 1.570207  |
| 58 | 6 | 0 | 6.692830   | 0.065830  | -0.319799 |
| 59 | 1 | 0 | 6.599613   | -1.207655 | -2.054815 |
| 60 | 1 | 0 | 6.464156   | 1.294445  | 1.434744  |

|    |   |   |           |           |           |
|----|---|---|-----------|-----------|-----------|
| 61 | 6 | 0 | 8.749523  | 1.499928  | -0.411734 |
| 62 | 6 | 0 | 9.058205  | -0.752317 | -0.496902 |
| 63 | 6 | 0 | 8.215483  | 2.790966  | -0.381830 |
| 64 | 6 | 0 | 10.145906 | 1.277585  | -0.510174 |
| 65 | 6 | 0 | 8.896479  | -2.140318 | -0.484128 |
| 66 | 6 | 0 | 10.342593 | -0.156372 | -0.561755 |
| 67 | 6 | 0 | 9.105564  | 3.862054  | -0.426522 |
| 68 | 1 | 0 | 7.145578  | 2.959384  | -0.334264 |
| 69 | 6 | 0 | 11.018085 | 2.371077  | -0.553283 |
| 70 | 6 | 0 | 10.043452 | -2.927490 | -0.563335 |
| 71 | 1 | 0 | 7.915222  | -2.594681 | -0.406743 |
| 72 | 6 | 0 | 11.478392 | -0.970008 | -0.640826 |
| 73 | 6 | 0 | 10.493280 | 3.659059  | -0.506236 |
| 74 | 1 | 0 | 8.713877  | 4.874607  | -0.402731 |
| 75 | 1 | 0 | 12.090354 | 2.214853  | -0.628090 |
| 76 | 6 | 0 | 11.322608 | -2.352834 | -0.646172 |
| 77 | 1 | 0 | 9.942483  | -4.008695 | -0.557001 |
| 78 | 1 | 0 | 12.468510 | -0.526344 | -0.691738 |
| 79 | 1 | 0 | 11.159481 | 4.515539  | -0.537378 |
| 80 | 1 | 0 | 12.195711 | -2.994801 | -0.708753 |
| 81 | 7 | 0 | 8.091501  | 0.260622  | -0.404958 |

**Table S3.** Cartesian coordinates for optimized geometry of NI3

| Center number | Atomic number | Atomic type | Coordinates (Angstroms) |           |           |
|---------------|---------------|-------------|-------------------------|-----------|-----------|
|               |               |             | X                       | Y         | Z         |
| 1             | 6             | 0           | -1.707621               | -0.588988 | 1.333733  |
| 2             | 6             | 0           | -1.090383               | -1.286108 | 0.265247  |
| 3             | 6             | 0           | -1.853223               | -2.167832 | -0.542222 |
| 4             | 6             | 0           | -0.959883               | 0.270659  | 2.121861  |
| 5             | 6             | 0           | 0.299598                | -1.107309 | -0.004324 |
| 6             | 6             | 0           | 0.406459                | 0.460555  | 1.874244  |
| 7             | 6             | 0           | 0.877979                | -1.823962 | -1.080756 |
| 8             | 6             | 0           | 0.115732                | -2.677658 | -1.853441 |
| 9             | 6             | 0           | -1.255967               | -2.852322 | -1.585548 |
| 10            | 1             | 0           | -1.867264               | -3.519299 | -2.183609 |
| 11            | 1             | 0           | 0.575015                | -3.219160 | -2.674288 |
| 12            | 1             | 0           | -1.456230               | 0.791978  | 2.932936  |
| 13            | 1             | 0           | 0.979714                | 1.136618  | 2.498991  |
| 14            | 6             | 0           | 1.051536                | -0.207368 | 0.830923  |
| 15            | 1             | 0           | 1.934531                | -1.690586 | -1.288434 |
| 16            | 6             | 0           | -3.300339               | -2.367425 | -0.276937 |
| 17            | 8             | 0           | -3.990164               | -3.127351 | -0.945014 |
| 18            | 6             | 0           | -3.151728               | -0.766177 | 1.622083  |
| 19            | 8             | 0           | -3.708630               | -0.180436 | 2.542227  |
| 20            | 6             | 0           | 2.434964                | 0.006075  | 0.604944  |
| 21            | 6             | 0           | 3.624864                | 0.208091  | 0.432133  |
| 22            | 6             | 0           | 4.994872                | 0.430535  | 0.220361  |
| 23            | 6             | 0           | 5.835691                | 1.254350  | 0.927374  |

|    |    |   |           |           |           |
|----|----|---|-----------|-----------|-----------|
| 24 | 6  | 0 | 7.350448  | 0.383436  | -0.668286 |
| 25 | 6  | 0 | 7.182955  | 1.248554  | 0.444814  |
| 26 | 1  | 0 | 5.496378  | 1.846740  | 1.768771  |
| 27 | 6  | 0 | 8.590917  | 0.228935  | -1.294376 |
| 28 | 6  | 0 | 8.298483  | 1.964717  | 0.923475  |
| 29 | 6  | 0 | 9.673621  | 0.948027  | -0.800589 |
| 30 | 1  | 0 | 8.707378  | -0.435343 | -2.144746 |
| 31 | 6  | 0 | 9.527812  | 1.810894  | 0.302052  |
| 32 | 1  | 0 | 8.186798  | 2.630624  | 1.774152  |
| 33 | 1  | 0 | 10.644930 | 0.841160  | -1.273682 |
| 34 | 1  | 0 | 10.389411 | 2.360774  | 0.667763  |
| 35 | 16 | 0 | 5.843546  | -0.405521 | -1.097694 |
| 36 | 6  | 0 | -5.298705 | -1.857843 | 1.057911  |
| 37 | 1  | 0 | -5.483568 | -2.927311 | 0.943459  |
| 38 | 1  | 0 | -5.458524 | -1.569183 | 2.096703  |
| 39 | 6  | 0 | -6.228611 | -1.072383 | 0.123773  |
| 40 | 1  | 0 | -6.049346 | -1.397290 | -0.907364 |
| 41 | 1  | 0 | -7.254893 | -1.378781 | 0.368508  |
| 42 | 6  | 0 | -6.115744 | 0.453349  | 0.227017  |
| 43 | 1  | 0 | -5.096332 | 0.766233  | -0.034782 |
| 44 | 1  | 0 | -6.266187 | 0.763932  | 1.268891  |
| 45 | 6  | 0 | -7.112029 | 1.185596  | -0.680617 |
| 46 | 1  | 0 | -6.960463 | 0.864554  | -1.721228 |
| 47 | 1  | 0 | -8.135317 | 0.880993  | -0.417544 |
| 48 | 6  | 0 | -7.003497 | 2.713037  | -0.600823 |
| 49 | 1  | 0 | -5.981312 | 3.018975  | -0.866268 |
| 50 | 1  | 0 | -7.152927 | 3.033903  | 0.440020  |
| 51 | 6  | 0 | -8.000992 | 3.448184  | -1.504401 |
| 52 | 1  | 0 | -7.851017 | 3.127643  | -2.544429 |
| 53 | 1  | 0 | -9.022316 | 3.142888  | -1.238736 |
| 54 | 6  | 0 | -7.885816 | 4.973046  | -1.418663 |
| 55 | 1  | 0 | -8.609981 | 5.468004  | -2.074031 |
| 56 | 1  | 0 | -8.065727 | 5.327123  | -0.397163 |
| 57 | 1  | 0 | -6.885800 | 5.312012  | -1.712488 |
| 58 | 7  | 0 | -3.861670 | -1.643227 | 0.785459  |

**Table S4.** Cartesian coordinates for optimized geometry of **PI1**

| Center number | Atomic number | Atomic type | Coordinates (Angstroms) |           |           |
|---------------|---------------|-------------|-------------------------|-----------|-----------|
|               |               |             | X                       | Y         | Z         |
| 1             | 6             | 0           | 5.771556                | 2.585795  | -0.538074 |
| 2             | 6             | 0           | 4.383197                | 2.666426  | -0.674246 |
| 3             | 6             | 0           | 3.536557                | 1.642037  | -0.241687 |
| 4             | 6             | 0           | 4.122533                | 0.480408  | 0.353246  |
| 5             | 6             | 0           | 5.544177                | 0.407946  | 0.493101  |
| 6             | 6             | 0           | 6.359379                | 1.473470  | 0.040835  |
| 7             | 6             | 0           | 2.072649                | 1.719025  | -0.377070 |
| 8             | 6             | 0           | 3.318426                | -0.612037 | 0.812089  |
| 9             | 6             | 0           | 1.860122                | -0.537852 | 0.663763  |

|    |   |   |           |           |           |
|----|---|---|-----------|-----------|-----------|
| 10 | 6 | 0 | 1.264803  | 0.625226  | 0.077322  |
| 11 | 6 | 0 | 1.021250  | -1.572377 | 1.079413  |
| 12 | 6 | 0 | 3.958944  | -1.714200 | 1.387159  |
| 13 | 6 | 0 | 5.348048  | -1.775606 | 1.520065  |
| 14 | 6 | 0 | 6.145313  | -0.730921 | 1.081565  |
| 15 | 1 | 0 | 5.827531  | -2.639447 | 1.967484  |
| 16 | 1 | 0 | 6.412978  | 3.390180  | -0.881367 |
| 17 | 6 | 0 | 1.444408  | 2.828834  | -0.936473 |
| 18 | 6 | 0 | 0.049643  | 2.899531  | -1.067025 |
| 19 | 6 | 0 | -0.741584 | 1.856851  | -0.638242 |
| 20 | 6 | 0 | -0.160104 | 0.704458  | -0.060950 |
| 21 | 1 | 0 | -0.401609 | 3.782413  | -1.509081 |
| 22 | 1 | 0 | -1.820638 | 1.900489  | -0.735268 |
| 23 | 6 | 0 | -0.366307 | -1.505514 | 0.947090  |
| 24 | 1 | 0 | -0.979428 | -2.333573 | 1.285833  |
| 25 | 6 | 0 | -0.982992 | -0.388110 | 0.388013  |
| 26 | 1 | 0 | 3.379034  | -2.555153 | 1.746854  |
| 27 | 1 | 0 | 3.971638  | 3.557225  | -1.132350 |
| 28 | 1 | 0 | 2.031711  | 3.669583  | -1.285152 |
| 29 | 1 | 0 | 1.439803  | -2.467462 | 1.523205  |
| 30 | 6 | 0 | 7.614068  | -0.824325 | 1.232800  |
| 31 | 6 | 0 | 7.832317  | 1.414913  | 0.172592  |
| 32 | 8 | 0 | 8.165567  | -1.803194 | 1.724091  |
| 33 | 8 | 0 | 8.565887  | 2.312611  | -0.226747 |
| 34 | 7 | 0 | 8.367127  | 0.272614  | 0.786962  |
| 35 | 6 | 0 | 9.832014  | 0.197065  | 0.931917  |
| 36 | 6 | 0 | 10.510517 | -0.456680 | -0.276409 |
| 37 | 1 | 0 | 10.030031 | -0.379571 | 1.836451  |
| 38 | 1 | 0 | 10.189155 | 1.219416  | 1.062186  |
| 39 | 6 | 0 | 12.033264 | -0.529622 | -0.113353 |
| 40 | 1 | 0 | 10.102713 | -1.466095 | -0.407276 |
| 41 | 1 | 0 | 10.260392 | 0.117723  | -1.176481 |
| 42 | 6 | 0 | 12.737696 | -1.190049 | -1.304685 |
| 43 | 1 | 0 | 12.433954 | 0.484086  | 0.028516  |
| 44 | 1 | 0 | 12.275564 | -1.085282 | 0.803665  |
| 45 | 1 | 0 | 12.336779 | -2.203775 | -1.446346 |
| 46 | 1 | 0 | 12.493726 | -0.636843 | -2.222811 |
| 47 | 6 | 0 | 14.261554 | -1.266240 | -1.150208 |
| 48 | 6 | 0 | 14.957552 | -1.929633 | -2.342354 |
| 49 | 1 | 0 | 14.504591 | -1.817262 | -0.231449 |
| 50 | 1 | 0 | 14.661662 | -0.252845 | -1.009863 |
| 51 | 1 | 0 | 16.042865 | -1.968327 | -2.202827 |
| 52 | 1 | 0 | 14.604057 | -2.957072 | -2.485784 |
| 53 | 1 | 0 | 14.761204 | -1.381596 | -3.270958 |
| 54 | 6 | 0 | -2.394977 | -0.342721 | 0.272561  |
| 55 | 6 | 0 | -3.611270 | -0.324333 | 0.188019  |
| 56 | 6 | 0 | -5.027771 | -0.310948 | 0.097437  |
| 57 | 6 | 0 | -5.791696 | -1.425577 | 0.503498  |
| 58 | 6 | 0 | -5.717311 | 0.816014  | -0.397404 |
| 59 | 6 | 0 | -7.175796 | -1.412254 | 0.425975  |



|    |   |   |            |           |           |
|----|---|---|------------|-----------|-----------|
| 60 | 1 | 0 | -5.283437  | -2.299835 | 0.896970  |
| 61 | 6 | 0 | -7.100630  | 0.827849  | -0.485931 |
| 62 | 1 | 0 | -5.151218  | 1.681523  | -0.726181 |
| 63 | 6 | 0 | -7.858273  | -0.285112 | -0.071943 |
| 64 | 1 | 0 | -7.741842  | -2.275309 | 0.757706  |
| 65 | 1 | 0 | -7.607476  | 1.700653  | -0.881634 |
| 66 | 7 | 0 | -9.266236  | -0.269802 | -0.153189 |
| 67 | 6 | 0 | -9.986684  | -1.463659 | -0.449775 |
| 68 | 6 | 0 | -11.131683 | -1.800435 | 0.287759  |
| 69 | 6 | 0 | -9.568257  | -2.308780 | -1.489056 |
| 70 | 6 | 0 | -11.845087 | -2.958342 | -0.015843 |
| 71 | 1 | 0 | -11.456570 | -1.150893 | 1.093673  |
| 72 | 6 | 0 | -10.277852 | -3.473887 | -1.773243 |
| 73 | 1 | 0 | -8.689365  | -2.047051 | -2.068901 |
| 74 | 6 | 0 | -11.421192 | -3.803831 | -1.042803 |
| 75 | 1 | 0 | -12.729753 | -3.206037 | 0.563542  |
| 76 | 1 | 0 | -9.942072  | -4.118299 | -2.580495 |
| 77 | 1 | 0 | -11.975720 | -4.708470 | -1.271972 |
| 78 | 6 | 0 | -9.989576  | 0.938272  | 0.070242  |
| 79 | 6 | 0 | -9.668473  | 1.771389  | 1.152969  |
| 80 | 6 | 0 | -11.041784 | 1.300755  | -0.783987 |
| 81 | 6 | 0 | -10.380187 | 2.950414  | 1.365048  |
| 82 | 1 | 0 | -8.863073  | 1.489387  | 1.822965  |
| 83 | 6 | 0 | -11.759722 | 2.472589  | -0.553011 |
| 84 | 1 | 0 | -11.291299 | 0.659781  | -1.622917 |
| 85 | 6 | 0 | -11.431292 | 3.306367  | 0.517645  |
| 86 | 1 | 0 | -10.120272 | 3.585179  | 2.207190  |
| 87 | 1 | 0 | -12.571860 | 2.740172  | -1.222710 |
| 88 | 1 | 0 | -11.988549 | 4.221813  | 0.690317  |

**Table S5.** Cartesian coordinates for optimized geometry of PI2

| Center number | Atomic number | Atomic type | Coordinates (Angstroms) |           |           |
|---------------|---------------|-------------|-------------------------|-----------|-----------|
|               |               |             | X                       | Y         | Z         |
| 1             | 6             | 0           | 5.809263                | -2.299170 | -1.415842 |
| 2             | 6             | 0           | 4.419612                | -2.378787 | -1.397157 |
| 3             | 6             | 0           | 3.568925                | -1.337381 | -1.017874 |
| 4             | 6             | 0           | 4.151212                | -0.087738 | -0.635869 |
| 5             | 6             | 0           | 5.573585                | 0.058378  | -0.664363 |
| 6             | 6             | 0           | 6.393338                | -1.026714 | -1.057656 |
| 7             | 6             | 0           | 2.103969                | -1.483367 | -0.997151 |
| 8             | 6             | 0           | 3.343386                | 1.020106  | -0.224401 |
| 9             | 6             | 0           | 1.883502                | 0.864541  | -0.183405 |
| 10            | 6             | 0           | 1.291977                | -0.380098 | -0.574298 |
| 11            | 6             | 0           | 1.042269                | 1.897681  | 0.229102  |
| 12            | 6             | 0           | 3.979832                | 2.213987  | 0.127500  |
| 13            | 6             | 0           | 5.370295                | 2.348370  | 0.094106  |
| 14            | 6             | 0           | 6.171183                | 1.287784  | -0.295514 |
| 15            | 1             | 0           | 5.847009                | 3.281799  | 0.372871  |

|    |   |   |           |           |           |
|----|---|---|-----------|-----------|-----------|
| 16 | 1 | 0 | 6.453815  | -3.050840 | -1.710591 |
| 17 | 6 | 0 | 1.478830  | -2.668394 | -1.376022 |
| 18 | 6 | 0 | 0.083220  | -2.808404 | -1.347739 |
| 19 | 6 | 0 | -0.711901 | -1.761838 | -0.936922 |
| 20 | 6 | 0 | -0.133367 | -0.532750 | -0.543421 |
| 21 | 1 | 0 | -0.365360 | -3.749240 | -1.651155 |
| 22 | 1 | 0 | -1.791211 | -1.861121 | -0.908289 |
| 23 | 6 | 0 | -0.345994 | 1.756231  | 0.268149  |
| 24 | 1 | 0 | -0.961987 | 2.586014  | 0.597321  |
| 25 | 6 | 0 | -0.957601 | 0.564011  | -0.110506 |
| 26 | 1 | 0 | 3.396711  | 3.072053  | 0.438183  |
| 27 | 1 | 0 | 4.011012  | -3.339000 | -1.686597 |
| 28 | 1 | 0 | 2.068822  | -3.515207 | -1.704754 |
| 29 | 1 | 0 | 1.458092  | 2.849463  | 0.536064  |
| 30 | 6 | 0 | 7.641919  | 1.456368  | -0.316162 |
| 31 | 6 | 0 | 7.867886  | -0.897168 | -1.085722 |
| 32 | 8 | 0 | 8.189056  | 2.503195  | 0.011947  |
| 33 | 8 | 0 | 8.604166  | -1.825405 | -1.400136 |
| 34 | 7 | 0 | 8.399651  | 0.352923  | -0.735569 |
| 35 | 6 | 0 | 9.866111  | 0.502963  | -0.761563 |
| 36 | 6 | 0 | 10.517370 | 0.146350  | 0.578663  |
| 37 | 1 | 0 | 10.072257 | 1.542477  | -1.020355 |
| 38 | 1 | 0 | 10.235320 | -0.152462 | -1.551329 |
| 39 | 6 | 0 | 12.042645 | 0.297450  | 0.538614  |
| 40 | 1 | 0 | 10.100392 | 0.795597  | 1.357770  |
| 41 | 1 | 0 | 10.253985 | -0.886438 | 0.836712  |
| 42 | 6 | 0 | 12.717902 | -0.042082 | 1.872780  |
| 43 | 1 | 0 | 12.452543 | -0.349050 | -0.250244 |
| 44 | 1 | 0 | 12.299707 | 1.327614  | 0.253952  |
| 45 | 1 | 0 | 12.310192 | 0.606982  | 2.660780  |
| 46 | 1 | 0 | 12.455654 | -1.069912 | 2.161399  |
| 47 | 6 | 0 | 14.244644 | 0.099366  | 1.840943  |
| 48 | 6 | 0 | 14.910886 | -0.237297 | 3.178228  |
| 49 | 1 | 0 | 14.506373 | 1.125565  | 1.549195  |
| 50 | 1 | 0 | 14.651433 | -0.551572 | 1.055083  |
| 51 | 1 | 0 | 15.998987 | -0.128818 | 3.122903  |
| 52 | 1 | 0 | 14.551354 | 0.421434  | 3.976964  |
| 53 | 1 | 0 | 14.694672 | -1.268488 | 3.480152  |
| 54 | 6 | 0 | -2.371015 | 0.449229  | -0.059507 |
| 55 | 6 | 0 | -3.585827 | 0.375177  | -0.003252 |
| 56 | 6 | 0 | -5.003685 | 0.301852  | 0.072613  |
| 57 | 6 | 0 | -5.749600 | 1.363775  | 0.624490  |
| 58 | 6 | 0 | -5.698214 | -0.831284 | -0.398126 |
| 59 | 6 | 0 | -7.133554 | 1.290151  | 0.712084  |
| 60 | 1 | 0 | -5.228492 | 2.238184  | 0.999495  |
| 61 | 6 | 0 | -7.083680 | -0.896295 | -0.327284 |
| 62 | 1 | 0 | -5.140054 | -1.652269 | -0.835603 |
| 63 | 6 | 0 | -7.815187 | 0.161272  | 0.233314  |
| 64 | 1 | 0 | -7.695140 | 2.099510  | 1.165663  |
| 65 | 1 | 0 | -7.610146 | -1.759687 | -0.719102 |

|    |   |   |            |           |           |
|----|---|---|------------|-----------|-----------|
| 66 | 6 | 0 | -10.125302 | 1.066671  | -0.139119 |
| 67 | 6 | 0 | -9.965783  | -0.968476 | 0.863381  |
| 68 | 6 | 0 | -9.870092  | 2.274990  | -0.793198 |
| 69 | 6 | 0 | -11.448460 | 0.629309  | 0.120120  |
| 70 | 6 | 0 | -9.519200  | -2.143156 | 1.474921  |
| 71 | 6 | 0 | -11.346792 | -0.665897 | 0.760039  |
| 72 | 6 | 0 | -10.963277 | 3.055512  | -1.163379 |
| 73 | 1 | 0 | -8.858265  | 2.595132  | -1.014658 |
| 74 | 6 | 0 | -12.528784 | 1.432876  | -0.261583 |
| 75 | 6 | 0 | -10.480239 | -3.027105 | 1.961136  |
| 76 | 1 | 0 | -8.462038  | -2.360438 | 1.577500  |
| 77 | 6 | 0 | -12.291378 | -1.571177 | 1.256566  |
| 78 | 6 | 0 | -12.280350 | 2.645370  | -0.897635 |
| 79 | 1 | 0 | -10.789533 | 3.999573  | -1.671166 |
| 80 | 1 | 0 | -13.547738 | 1.110207  | -0.068131 |
| 81 | 6 | 0 | -11.853145 | -2.750787 | 1.850643  |
| 82 | 1 | 0 | -10.156846 | -3.947388 | 2.438415  |
| 83 | 1 | 0 | -13.352697 | -1.352098 | 1.182921  |
| 84 | 1 | 0 | -13.109767 | 3.278396  | -1.197196 |
| 85 | 1 | 0 | -12.576115 | -3.461993 | 2.237800  |
| 86 | 7 | 0 | -9.226328  | 0.090184  | 0.315168  |

**Table S6.** Cartesian coordinates for optimized geometry of PI3

| Center number | Atomic number | Atomic type | Coordinates (Angstroms) |           |           |
|---------------|---------------|-------------|-------------------------|-----------|-----------|
|               |               |             | X                       | Y         | Z         |
| 1             | 6             | 0           | 3.366552                | 2.621500  | 0.325150  |
| 2             | 6             | 0           | 1.977884                | 2.719612  | 0.199885  |
| 3             | 6             | 0           | 1.148188                | 1.597060  | 0.261371  |
| 4             | 6             | 0           | 1.751483                | 0.314759  | 0.456546  |
| 5             | 6             | 0           | 3.172652                | 0.223773  | 0.588686  |
| 6             | 6             | 0           | 3.970749                | 1.391046  | 0.520272  |
| 7             | 6             | 0           | -0.315594               | 1.689792  | 0.132518  |
| 8             | 6             | 0           | 0.965968                | -0.880252 | 0.522963  |
| 9             | 6             | 0           | -0.492985               | -0.785887 | 0.384751  |
| 10            | 6             | 0           | -1.105533               | 0.495020  | 0.195408  |
| 11            | 6             | 0           | -1.313459               | -1.913121 | 0.433212  |
| 12            | 6             | 0           | 1.622663                | -2.098932 | 0.717720  |
| 13            | 6             | 0           | 3.011684                | -2.177999 | 0.846803  |
| 14            | 6             | 0           | 3.790749                | -1.034618 | 0.785520  |
| 15            | 1             | 0           | 3.504399                | -3.132398 | 0.997044  |
| 16            | 1             | 0           | 3.994523                | 3.504179  | 0.272525  |
| 17            | 6             | 0           | -0.960902               | 2.910105  | -0.049299 |
| 18            | 6             | 0           | -2.355542               | 2.996593  | -0.173375 |
| 19            | 6             | 0           | -3.130140               | 1.859286  | -0.117600 |
| 20            | 6             | 0           | -2.530191               | 0.591940  | 0.066124  |
| 21            | 1             | 0           | -2.820437               | 3.967374  | -0.313950 |
| 22            | 1             | 0           | -4.208699               | 1.917706  | -0.212908 |
| 23            | 6             | 0           | -2.700736               | -1.829772 | 0.306915  |

|    |    |   |            |           |           |
|----|----|---|------------|-----------|-----------|
| 24 | 1  | 0 | -3.300397  | -2.732375 | 0.351324  |
| 25 | 6  | 0 | -3.332029  | -0.601374 | 0.125551  |
| 26 | 1  | 0 | 1.056949   | -3.020609 | 0.773749  |
| 27 | 1  | 0 | 1.553188   | 3.704448  | 0.049977  |
| 28 | 1  | 0 | -0.387830  | 3.827881  | -0.098252 |
| 29 | 1  | 0 | -0.881355  | -2.896325 | 0.573041  |
| 30 | 6  | 0 | 5.260306   | -1.147868 | 0.925285  |
| 31 | 6  | 0 | 5.443727   | 1.316427  | 0.649969  |
| 32 | 8  | 0 | 5.825185   | -2.224218 | 1.084486  |
| 33 | 8  | 0 | 6.161814   | 2.306972  | 0.574648  |
| 34 | 7  | 0 | 5.995390   | 0.045454  | 0.870721  |
| 35 | 6  | 0 | 7.459947   | -0.050100 | 1.010301  |
| 36 | 6  | 0 | 8.165410   | -0.292604 | -0.328181 |
| 37 | 1  | 0 | 7.658359   | -0.873276 | 1.698203  |
| 38 | 1  | 0 | 7.795274   | 0.888174  | 1.453629  |
| 39 | 6  | 0 | 9.686887   | -0.390550 | -0.166999 |
| 40 | 1  | 0 | 7.778345   | -1.219174 | -0.768338 |
| 41 | 1  | 0 | 7.916082   | 0.525999  | -1.014077 |
| 42 | 6  | 0 | 10.419476  | -0.655900 | -1.487955 |
| 43 | 1  | 0 | 10.067380  | 0.539351  | 0.278733  |
| 44 | 1  | 0 | 9.926296   | -1.191859 | 0.546396  |
| 45 | 1  | 0 | 10.038898  | -1.586550 | -1.932244 |
| 46 | 1  | 0 | 10.178526  | 0.142431  | -2.204263 |
| 47 | 6  | 0 | 11.942079  | -0.754768 | -1.334726 |
| 48 | 6  | 0 | 12.665599  | -1.030689 | -2.656232 |
| 49 | 1  | 0 | 12.181712  | -1.548206 | -0.613766 |
| 50 | 1  | 0 | 12.322773  | 0.177644  | -0.896164 |
| 51 | 1  | 0 | 13.749293  | -1.096306 | -2.514407 |
| 52 | 1  | 0 | 12.330723  | -1.974720 | -3.100930 |
| 53 | 1  | 0 | 12.473550  | -0.236587 | -3.386806 |
| 54 | 6  | 0 | -4.742673  | -0.546286 | 0.004771  |
| 55 | 6  | 0 | -5.958493  | -0.537078 | -0.092207 |
| 56 | 6  | 0 | -7.357476  | -0.507649 | -0.203168 |
| 57 | 6  | 0 | -8.232399  | -1.565208 | -0.159337 |
| 58 | 6  | 0 | -9.755676  | 0.221103  | -0.458595 |
| 59 | 6  | 0 | -9.603943  | -1.181700 | -0.301827 |
| 60 | 1  | 0 | -7.900586  | -2.588240 | -0.027871 |
| 61 | 6  | 0 | -11.014971 | 0.807780  | -0.613837 |
| 62 | 6  | 0 | -10.755550 | -1.994054 | -0.303535 |
| 63 | 6  | 0 | -12.133518 | -0.018384 | -0.611607 |
| 64 | 1  | 0 | -11.118726 | 1.881603  | -0.733148 |
| 65 | 6  | 0 | -12.003953 | -1.411381 | -0.457120 |
| 66 | 1  | 0 | -10.656655 | -3.069123 | -0.184708 |
| 67 | 1  | 0 | -13.119917 | 0.419256  | -0.730831 |
| 68 | 1  | 0 | -12.893116 | -2.034243 | -0.458801 |
| 69 | 16 | 0 | -8.203733  | 1.039126  | -0.427250 |

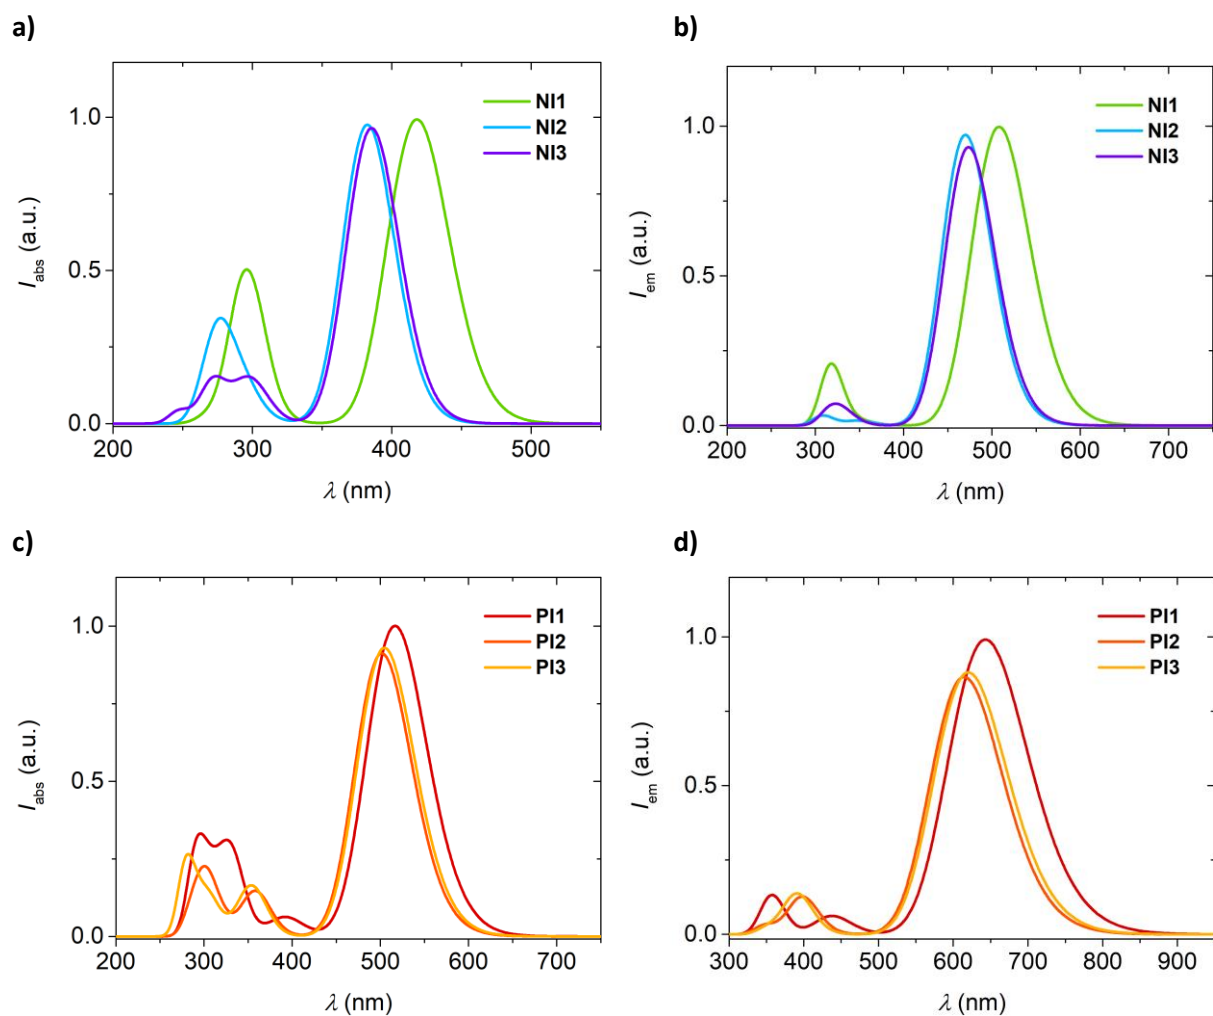

**Fig. S3.** Theoretical absorption (left column, a and c) and emission (right column, b and d) spectra of NI derivatives (top row, a and b) and PI derivatives (bottom row, c and d) calculated at B3LYP/6-31G(d,p) level .

**Table S7.** Electronic transitions associated with the absorption spectra of compounds **NI** calculated at M06-2X /6-311+G(2d,p) level.

| Compound | Spectrum   | Electronic transition              | <i>E</i> [eV] | $\lambda$ [nm] | <i>f</i>    | MO [coefficient %]                              |
|----------|------------|------------------------------------|---------------|----------------|-------------|-------------------------------------------------|
| NI1      | Absorption | <b>S<sub>0</sub>→S<sub>1</sub></b> | <b>2.97</b>   | <b>418.05</b>  | <b>1.45</b> | <b>H→L (77), H-1→L (14)</b>                     |
|          |            | S <sub>0</sub> →S <sub>2</sub>     | 3.79          | 326.35         | 0.01        | H-1→L (59), H→L+1 (25)                          |
|          |            | S <sub>0</sub> →S <sub>3</sub>     | 4.05          | 306.21         | 0.04        | H→L+2 (84)                                      |
|          |            | <b>S<sub>0</sub>→S<sub>4</sub></b> | <b>4.14</b>   | <b>299.79</b>  | <b>0.42</b> | <b>H-1→L (16), H→L (16), H→L+1 (49)</b>         |
|          | Emission   | S <sub>0</sub> →S <sub>6</sub>     | 4.29          | 288.71         | 0.31        | H→L+4 (87)                                      |
|          |            | <b>S<sub>1</sub>→S<sub>0</sub></b> | <b>2.44</b>   | <b>508.05</b>  | <b>1.67</b> | <b>L→H (87)</b>                                 |
|          |            | S <sub>3</sub> →S <sub>0</sub>     | 3.89          | 318.19         | 0.34        | L+1→H (64), L→H-1 (17)                          |
| NI2      | Absorption | <b>S<sub>0</sub>→S<sub>1</sub></b> | <b>3.24</b>   | <b>382.51</b>  | <b>1.43</b> | <b>H→L (56), H-2→L (38)</b>                     |
|          |            | S <sub>0</sub> →S <sub>2</sub>     | 3.89          | 318.45         | 0.01        | H-2→L (49), H→L (21), H→L+1 (17)                |
|          |            | S <sub>0</sub> →S <sub>3</sub>     | 4.17          | 297.36         | 0.1         | H-5→L (78), H-2→L+3(11)                         |
|          |            | S <sub>0</sub> →S <sub>4</sub>     | 4.24          | 292.5          | 0.1         | H→L+2 (83)                                      |
|          | Emission   | <b>S<sub>0</sub>→S<sub>7</sub></b> | <b>4.46</b>   | <b>277.9</b>   | <b>0.36</b> | <b>H-2→L+1(14), H→L (18), H→L+1 (53)</b>        |
|          |            | <b>S<sub>1</sub>→S<sub>0</sub></b> | <b>2.64</b>   | <b>469.9</b>   | <b>1.62</b> | <b>L→H (81), L→H-1 (14)</b>                     |
| NI3      | Absorption | <b>S<sub>0</sub>→S<sub>1</sub></b> | <b>3.22</b>   | <b>385.53</b>  | <b>1.41</b> | <b>H→L (88)</b>                                 |
|          |            | S <sub>0</sub> →S <sub>2</sub>     | 4.06          | 305.15         | 0.07        | H-2→L (16), H-1→L (56), H-L+1 (14)              |
|          |            | S <sub>0</sub> →S <sub>3</sub>     | 4.16          | 298.07         | 0.09        | H-3→L (77)                                      |
|          |            | S <sub>0</sub> →S <sub>4</sub>     | 4.22          | 293.21         | 0.08        | H-2→L (43), H-1→L (14), H-1→L+1(17), H→L+1 (13) |
|          | Emission   | <b>S<sub>0</sub>→S<sub>6</sub></b> | <b>4.55</b>   | <b>272.48</b>  | <b>0.19</b> | <b>H-2→L (18), H→L+1 (59)</b>                   |
|          |            | <b>S<sub>1</sub>→S<sub>0</sub></b> | <b>2.62</b>   | <b>473.47</b>  | <b>1.55</b> | <b>L→H (95)</b>                                 |

*E*: Transition energy,  $\lambda$ : Transition wavelength, *f*: Transition Oscillator Force, *MO*: Molecular Orbitals (H: HOMO. L: LUMO).

**Table S8.** Electronic transitions associated with the absorption spectra of compounds **PI** calculated at M06-2X/6-311+G(2d,p) level.

| Compound | Spectrum   | Electronic transition    | <i>E</i> [eV] | $\lambda$ [nm] | <i>f</i> | MO [coefficient %]                                             |
|----------|------------|--------------------------|---------------|----------------|----------|----------------------------------------------------------------|
| PI1      | Absorption | $S_0 \rightarrow S_1$    | 2.40          | 516.64         | 1.67     | H→L (70), H-1→L (27)                                           |
|          |            | $S_0 \rightarrow S_2$    | 3.16          | 392.14         | 0.10     | H-1→L (59), H→L (18), H→L+1 (11)                               |
|          |            | $S_0 \rightarrow S_3$    | 3.74          | 331.95         | 0.39     | H→L+1 (63)                                                     |
|          |            | $S_0 \rightarrow S_5$    | 3.95          | 313.73         | 0.12     | H-2→L (22), H-1→L+1 (23), H→L+5 (15)                           |
|          |            | $S_0 \rightarrow S_7$    | 4.09          | 302.87         | 0.12     | H-6→L (64)                                                     |
|          |            | $S_0 \rightarrow S_9$    | 4.23          | 292.52         | 0.1      | H-2→L (24), H-1→L+1 (30), H→L+5 (13)                           |
|          | Emission   | $S_0 \rightarrow S_{10}$ | 4.27          | 290.54         | 0.32     | H-1→L+6 (24), H→L+6 (67)                                       |
|          |            | $S_1 \rightarrow S_0$    | 1.93          | 643.15         | 1.78     | L→H (98)                                                       |
|          |            | $S_2 \rightarrow S_0$    | 2.83          | 437.79         | 0.11     | L→H-1 (78)                                                     |
|          |            | $S_3 \rightarrow S_0$    | 3.47          | 357.68         | 0.24     | L+1→H (77)                                                     |
| PI2      | Absorption | $S_0 \rightarrow S_1$    | 2.47          | 501.60         | 1.52     | H→L (87)                                                       |
|          |            | $S_0 \rightarrow S_2$    | 3.46          | 358.47         | 0.24     | H-3→L (19), H-1→L (53), H→L+1 (16)                             |
|          |            | $S_0 \rightarrow S_5$    | 4.05          | 306.45         | 0.13     | H-6→L (22), H-3→L (25), H→L+1 (18)                             |
|          |            | $S_0 \rightarrow S_6$    | 4.10          | 302.40         | 0.13     | H-6→L (47), H-3→L (16)                                         |
|          |            | $S_0 \rightarrow S_8$    | 4.23          | 293.19         | 0.10     | H-1→L+4 (62), H→L+4 (26)                                       |
|          | Emission   | $S_1 \rightarrow S_0$    | 2.02          | 614.60         | 1.5      | L→H (96)                                                       |
|          |            | $S_2 \rightarrow S_0$    | 3.11          | 398.40         | 0.23     | H-3→L (21), H-1→L (65)                                         |
| PI3      | Absorption | $S_0 \rightarrow S_1$    | 2.46          | 584.63         | 1.55     | H→L (96)                                                       |
|          |            | $S_0 \rightarrow S_2$    | 3.50          | 354.05         | 0.27     | H-2→L (12), H-1→L (51), H→L+1 (26)                             |
|          |            | $S_0 \rightarrow S_5$    | 4.06          | 305.20         | 0.14     | H-4→L (49)                                                     |
|          |            | $S_0 \rightarrow S_{10}$ | 4.43          | 280.08         | 0.38     | H-5→L (19), H-2→L+1 (11), H-1→L+1 (17), H→L+3 (11), H→L+4 (17) |
|          | Emission   | $S_1 \rightarrow S_0$    | 1.99          | 620.16         | 1.58     | L→H (98)                                                       |
|          |            | $S_2 \rightarrow S_0$    | 3.17          | 391.63         | 0.24     | H-2→L (10), H-1→L (68), H→L+1 (12)                             |

*E*: Transition energy,  $\lambda$ : Transition wavelength, *f*: Transition Oscillator Force, *MO*: Molecular Orbitals (H: HOMO. L: LUMO).

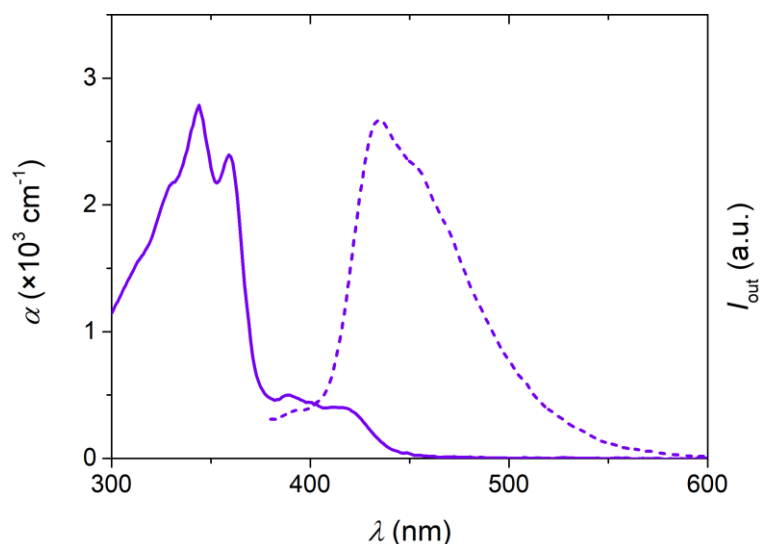

**Fig. S4.** Optical properties at room temperature of PS films doped with 1wt% of **NI3**. Absorption coefficient,  $\alpha$  (solid line, left axis) and photoluminescence intensity (dashed line, right axis) versus wavelength,  $\lambda$ . PL excitation wavelength was 364 nm

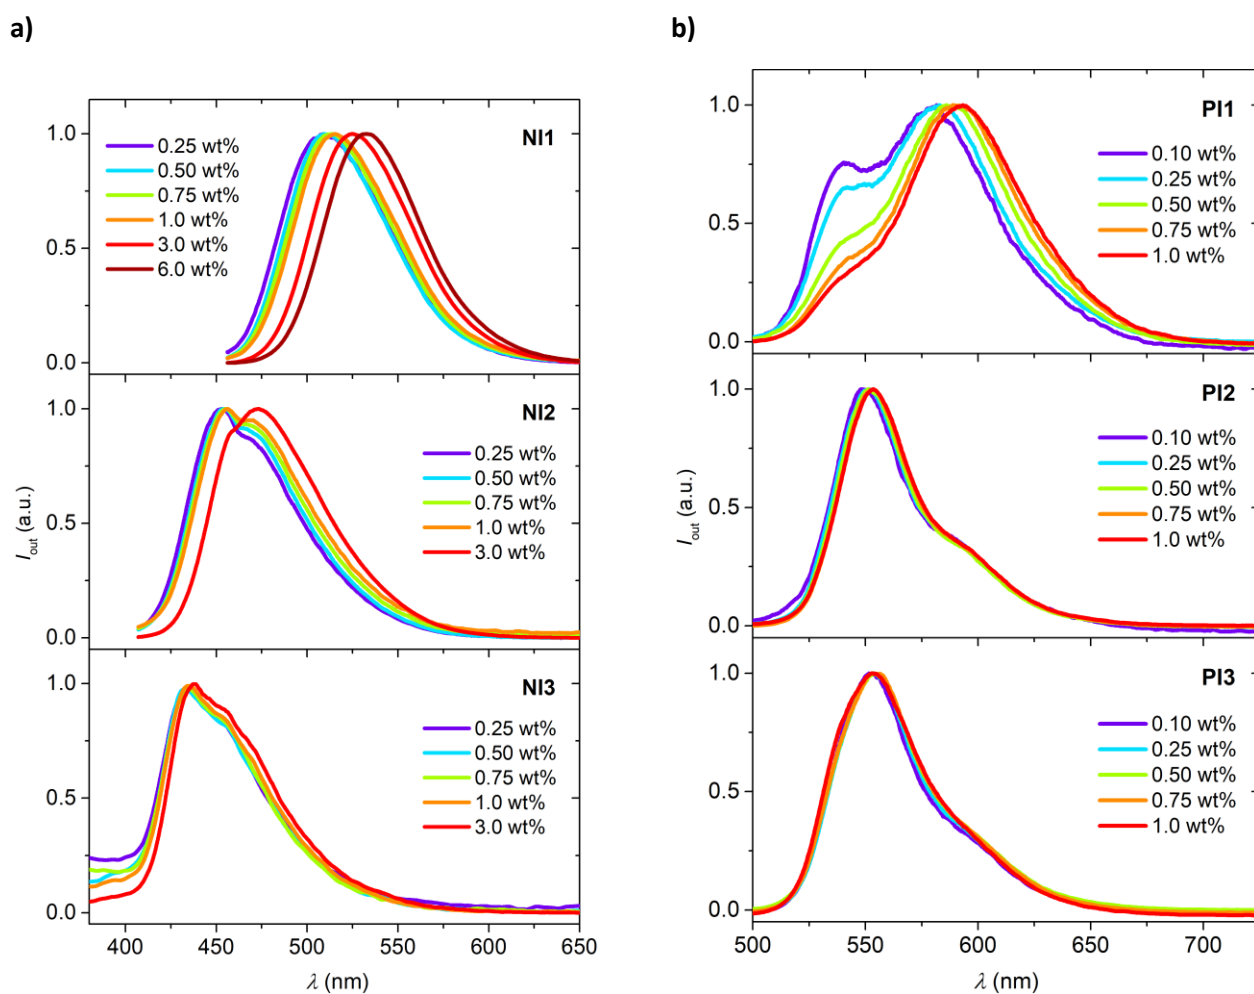

**Fig. S5.** Evolution of the photoluminescence intensity for different concentrations: a) From 0.25 wt% to 6 wt% of the naphthalendiimide derivatives **NI1**, **NI2**, and **NI3**, from top to down; b) From 0.10 wt% to 1 wt% of the perylenimide derivatives **PI1**, **PI2**, and **PI3**, from top to down.



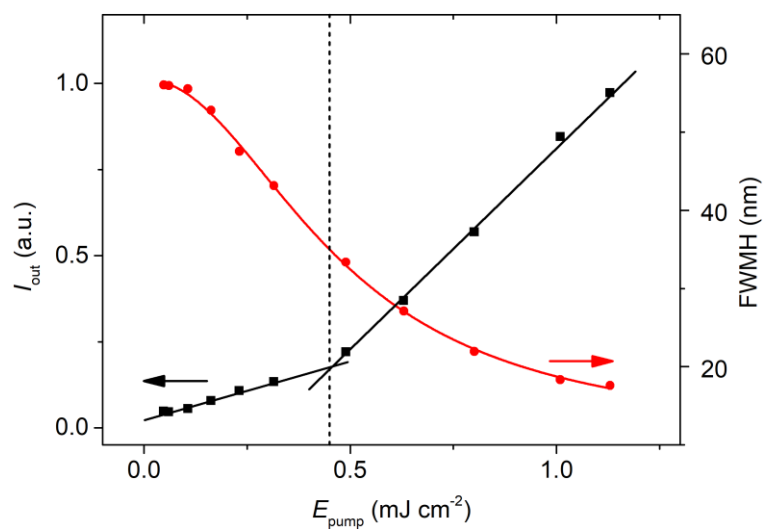

**Fig. S6.** Amplified spontaneous emission (ASE) threshold determination. Output intensity,  $I_{\text{out}}$ , (red circles, left axis) and emission linewidth, FWHM, (black squares, right axis) as a function of the pump energy density,  $E_{\text{pump}}$ , for a PS film doped with 0.5 wt% of **PI2**. ASE threshold was determined as the  $E_{\text{pump}}$  value at which FWHM reaches the average value between the highest value at low  $E_{\text{pump}}$  and the lowest value at high  $E_{\text{pump}}$ . In this case, the ASE threshold is  $0.45 \text{ mJ cm}^{-2}$  and it is indicated by the dotted line.

**Table S9.** Optical and ASE properties of PS films doped with a) 1,8-Naphthalimides derivatives and b) peryleneimide derivatives.

a)

| Derivative | Conc.<br>[wt. %] in PS <sup>b</sup> | $\lambda_{\text{ABS-max}}^c$<br>[nm] | $\lambda_{\text{PL-max}}^d$<br>[nm] | $h^e$<br>[nm] | $\lambda_p^f$<br>[nm] | $\alpha (\lambda_p)^g$<br>[ $\times 10^3 \text{ cm}^{-1}$ ] | $t_p (\lambda_p)^i$<br>[ns] | $\lambda_{\text{ASE}}^j$<br>[nm] | FWHM <sup>k</sup><br>[nm] | $E_{\text{th-ASE}}^m$<br>[mJ/cm <sup>2</sup> ] | $I_{\text{th-ASE}}^m$<br>[kW/cm <sup>2</sup> ] | $\tau_{1/2}^{\text{ASE } n}$<br>[pump pulses] |
|------------|-------------------------------------|--------------------------------------|-------------------------------------|---------------|-----------------------|-------------------------------------------------------------|-----------------------------|----------------------------------|---------------------------|------------------------------------------------|------------------------------------------------|-----------------------------------------------|
| <b>NI1</b> | 0.25                                | <u>338</u> , 450                     | 488, <u>517</u> , 558               | 540           | 450                   | 0.24                                                        | 3.9                         | 544                              | 36                        | 7.2                                            | 1800                                           | -                                             |
|            | 0.50                                | <u>338</u> , 450                     | <u>516</u> , 558                    | 500           | 450                   | 0.46                                                        | 3.9                         | 545                              | 27                        | 1.3                                            | 330                                            | -                                             |
|            | 0.75                                | <u>338</u> , 455                     | <u>518</u> , 556                    | 480           | 450                   | 0.67                                                        | 3.9                         | 546                              | 16                        | 0.65                                           | 170                                            | $7.3 \times 10^2$                             |
|            | 1                                   | <u>338</u> , 455                     | <u>518</u> , 556                    | 460           | 450                   | 0.88                                                        | 3.9                         | 547                              | 16                        | 1.1                                            | 280                                            | -                                             |
|            | 3                                   | <u>338</u> , 455                     | <u>520</u> , 556                    | 610           | 450                   | 2.40                                                        | 3.9                         | 548                              | 16                        | 4.0                                            | 1000                                           | -                                             |
|            | 6                                   | <u>338</u> , 455                     | <u>522</u> , 556                    | 500           | 450                   | 4.82                                                        | 3.9                         | -                                | -                         | -                                              | -                                              | -                                             |
| <b>NI2</b> | 0.25                                | 400                                  | <u>451</u> , 478                    | 440           | 355                   | 0.23                                                        | 5.7                         | 475                              | 27                        | 35                                             | 6100                                           | -                                             |
|            | 0.50                                | 400                                  | <u>451</u> , 478                    | 450           | 355                   | 0.42                                                        | 5.7                         | 474                              | 19                        | 7.7                                            | 1350                                           | -                                             |
|            | 0.75                                | 400                                  | <u>451</u> , <u>478</u> , 512       | 440           | 355                   | 0.56                                                        | 5.7                         | 476                              | 19                        | 5.3                                            | 930                                            | $4.2 \times 10^3$                             |
|            | 1                                   | 400                                  | 452, <u>478</u> , 512               | 400           | 355                   | 0.69                                                        | 5.7                         | 477                              | 14                        | 10                                             | 1800                                           | -                                             |
|            | 3                                   | 400                                  | <u>480</u> , 512                    | 620           | 355                   | 1.83                                                        | 5.7                         | 480                              | 14                        | 16                                             | 2800                                           | -                                             |
| <b>NI3</b> | 0.25                                | <u>344</u> , 359                     | <u>426</u> , 448, 477               | 310           | 355                   | 0.12                                                        | 5.7                         | -                                | -                         | -                                              | -                                              | -                                             |
|            | 0.50                                | <u>344</u> , 359                     | <u>426</u> , 448, 477               | 320           | 355                   | 0.36                                                        | 5.7                         | -                                | -                         | -                                              | -                                              | -                                             |
|            | 0.75                                | <u>344</u> , 359                     | <u>426</u> , 448, 477               | 330           | 355                   | 0.60                                                        | 5.7                         | -                                | -                         | -                                              | -                                              | -                                             |
|            | 1                                   | <u>344</u> , 359                     | <u>427</u> , 448, 477               | 330           | 355                   | 0.85                                                        | 5.7                         | -                                | -                         | -                                              | -                                              | -                                             |
|            | 3                                   | <u>344</u> , 359                     | 427, <u>447</u> , 476               | 330           | 355                   | 2.22                                                        | 5.7                         | -                                | -                         | -                                              | -                                              | -                                             |

b)

| Derivative | Conc.<br>[wt. %] in PS <sup>b</sup> | $\lambda_{\text{ABS-max}}^{\text{c}}$<br>[nm] | $\lambda_{\text{PL-max}}^{\text{d}}$<br>[nm] | $h^{\text{e}}$<br>[nm] | $\lambda_{\text{p}}^{\text{f}}$<br>[nm] | $\alpha (\lambda_{\text{p}})^{\text{g}}$<br>[ $\times 10^3 \text{ cm}^{-1}$ ] | $t_{\text{p}} (\lambda_{\text{p}})^{\text{i}}$<br>[ns] | $\lambda_{\text{ASE}}^{\text{j}}$<br>[nm] | FWHM <sup>k</sup><br>[nm] | $E_{\text{th-ASE}}^{\text{m}}$<br>[ $\mu\text{J}/\text{cm}^2$ ] | $I_{\text{th-ASE}}^{\text{m}}$<br>[kW/cm <sup>2</sup> ] | $\tau_{1/2}^{\text{ASE n}}$<br>[pump pulses] |
|------------|-------------------------------------|-----------------------------------------------|----------------------------------------------|------------------------|-----------------------------------------|-------------------------------------------------------------------------------|--------------------------------------------------------|-------------------------------------------|---------------------------|-----------------------------------------------------------------|---------------------------------------------------------|----------------------------------------------|
| <b>PI1</b> | 0.10                                | 535                                           | 575, <u>612</u>                              | 495                    | 532                                     | 0.15                                                                          | 5.7                                                    | 632                                       | 22                        | 1700                                                            | 300                                                     | -                                            |
|            | 0.25                                | 535                                           | <u>612</u>                                   | 500                    | 532                                     | 0.34                                                                          | 5.7                                                    | 638                                       | 15                        | 850                                                             | 150                                                     | $2.2 \times 10^4$                            |
|            | 0.50                                | 535                                           | <u>614</u>                                   | 545                    | 532                                     | 0.55                                                                          | 5.7                                                    | 643                                       | 15                        | 1000                                                            | 180                                                     | -                                            |
|            | 0.75                                | 535                                           | <u>617</u>                                   | 525                    | 532                                     | 0.87                                                                          | 5.7                                                    | 641                                       | 15                        | 1700                                                            | 300                                                     | -                                            |
|            | 1                                   | 535                                           | <u>617</u>                                   | 505                    | 532                                     | 1.11                                                                          | 5.7                                                    | 640                                       | 11                        | 3500                                                            | 610                                                     | -                                            |
| <b>PI2</b> | 0.10                                | <u>533</u>                                    | <u>559</u> , 603                             | 490                    | 532                                     | 0.08                                                                          | 5.7                                                    | -                                         | -                         | -                                                               | -                                                       | -                                            |
|            | 0.25                                | 509, <u>533</u>                               | <u>560</u> , 603                             | 480                    | 532                                     | 0.14                                                                          | 5.7                                                    | 598                                       | 19                        | 1000                                                            | 180                                                     | -                                            |
|            | 0.50                                | 509, <u>533</u>                               | <u>560</u> , 604                             | 490                    | 532                                     | 0.21                                                                          | 5.7                                                    | 598                                       | 15                        | 450                                                             | 80                                                      | $2.2 \times 10^4$                            |
|            | 0.75                                | 509, <u>533</u>                               | <u>560</u> , 604                             | 480                    | 532                                     | 0.30                                                                          | 5.7                                                    | 599                                       | 13                        | 380                                                             | 70                                                      | -                                            |
|            | 1                                   | 509, <u>533</u>                               | <u>560</u> , 604                             | 500                    | 532                                     | 0.41                                                                          | 5.7                                                    | 599                                       | 13                        | 1200                                                            | 210                                                     | -                                            |
| <b>PI3</b> | 0.10                                | 512                                           | <u>561</u> , 605                             | 475                    | 532                                     | 0.14                                                                          | 5.7                                                    | 600                                       | 17                        | 900                                                             | 160                                                     | -                                            |
|            | 0.25                                | 512                                           | <u>561</u> , 607                             | 475                    | 532                                     | 0.27                                                                          | 5.7                                                    | 601                                       | 14                        | 700                                                             | 120                                                     | $2.2 \times 10^4$                            |
|            | 0.50                                | 512                                           | <u>561</u> , 607                             | 480                    | 532                                     | 0.34                                                                          | 5.7                                                    | 601                                       | 13                        | 750                                                             | 130                                                     | -                                            |
|            | 0.75                                | 512                                           | <u>562</u> , 607                             | 485                    | 532                                     | 0.37                                                                          | 5.7                                                    | 601                                       | 10                        | 800                                                             | 140                                                     | -                                            |
|            | 1                                   | 512                                           | <u>562</u> , 607                             | 510                    | 532                                     | 0.45                                                                          | 5.7                                                    | 601                                       | 12                        | 4500                                                            | 790                                                     | -                                            |

<sup>b</sup> Error ~0.1%

<sup>c</sup> Peak absorption wavelengths (maximum absorption peak is underlined)

<sup>d</sup> Peak photoluminescence wavelengths (maximum photoluminescence peak is underlined)

<sup>e</sup> Film thickness (error ~2%)

<sup>f</sup> Pump wavelength

<sup>g</sup> Absorption coefficient at  $\lambda_{\text{p}}$  (error ~2%)

<sup>i</sup> Pump pulse width at  $\lambda_{\text{p}}$

<sup>j</sup> ASE wavelength (error is  $\pm 0.5$  nm)

<sup>k</sup> ASE linewidth (error is  $\pm 1$  nm), defined as the full width at half maximum, FWHM, well above the threshold

<sup>m</sup> ASE threshold (error ~10%)

<sup>n</sup> ASE operational lifetime, characterized by the photostability half-life  $\tau_{1/2}^{\text{ASE}}$  (determined from Fig. 4) measured at 10 Hz with a pump intensity of 2500 kW/cm<sup>2</sup> (error 10%).

**Table S10.** ASE properties comparison between the **NI** derivatives and **PI** derivatives studied in this work and other small molecules emitting in the same spectral range.

| Derivative       | Concentration [wt. %] in PS | $\lambda_{\text{ABS-max}}^{\text{b}}$ [nm] | $\lambda_{\text{PL-max}}^{\text{c}}$ [nm] | PLQY <sup>d</sup> [%] | $h^{\text{e}}$ [nm] | $\lambda_{\text{p}}^{\text{f}}$ [nm] | $\alpha (\lambda_{\text{p}})^{\text{g}}$ [ $\times 10^3 \text{ cm}^{-1}$ ] | $\lambda_{\text{ASE}}^{\text{j}}$ [nm] | FWHM <sup>k</sup> [nm] | $E_{\text{th-ASE}}^{\text{m}}$ [ $\mu\text{J}/\text{cm}^2$ ] | $\tau_{1/2}^{\text{ASE n}}$ [pump pulses] | Reference |
|------------------|-----------------------------|--------------------------------------------|-------------------------------------------|-----------------------|---------------------|--------------------------------------|----------------------------------------------------------------------------|----------------------------------------|------------------------|--------------------------------------------------------------|-------------------------------------------|-----------|
| <b>NI1</b>       | 0.75                        | <u>338</u> , 455                           | <u>518</u> , 556                          | 94*                   | 480                 | 450                                  | 0.67                                                                       | 546                                    | 16                     | 650                                                          | $7.3 \times 10^2$                         | This work |
| <b>NI2</b>       | 0.75                        | 400                                        | <u>451</u> , <u>478</u> , 512             | 91*                   | 440                 | 355                                  | 0.56                                                                       | 476                                    | 19                     | 5300                                                         | $4.2 \times 10^3$                         | This work |
| <b>PI1</b>       | 0.25                        | 535                                        | <u>612</u>                                | 94*                   | 500                 | 532                                  | 0.34                                                                       | 638                                    | 15                     | 850                                                          | $2.2 \times 10^4$                         | This work |
| <b>PI2</b>       | 0.50                        | 509, <u>533</u>                            | <u>560</u> , 604                          | 91*                   | 490                 | 532                                  | 0.21                                                                       | 598                                    | 15                     | 450                                                          | $2.2 \times 10^4$                         | This work |
| <b>PI3</b>       | 0.25                        | 512                                        | <u>561</u> , 607                          | 63*                   | 475                 | 532                                  | 0.27                                                                       | 601                                    | 14                     | 700                                                          | $2.2 \times 10^4$                         | This work |
| <b>PDI-C6</b>    | 0.50                        | -                                          | <u>535</u> , 574                          | -                     | 610                 | 532                                  | -                                                                          | 579                                    | 7                      | 120                                                          | $1.0 \times 10^4$                         | 27        |
| <b>PDI-O</b>     | 0.50                        | 492, <u>528</u>                            | <u>537</u> , 576                          | -                     | 630                 | 532                                  | -                                                                          | 578                                    | 8                      | 40                                                           | $3.8 \times 10^4$                         | 27        |
| <b>b-PDI-O</b>   | 5.0                         | 487, 520, <u>560</u>                       | <u>579</u> , 619                          | $42 \pm 3$            | 550                 | 532                                  | 2.9                                                                        | 624                                    | 7                      | 500                                                          | $4.8 \times 10^3$                         | 29        |
| <b>b-PDI-Tp</b>  | 1.0                         | 487, 519, <u>559</u>                       | <u>570</u> , 616                          | $61 \pm 5$            | 550                 | 532                                  | 0.6                                                                        | 618                                    | 6                      | 230                                                          | $1.6 \times 10^4$                         | 29        |
| <b>b-PDI-A</b>   | 10.0                        | 485, 518, <u>558</u>                       | <u>577</u> , 619                          | $78 \pm 3$            | 550                 | 532                                  | 5.0                                                                        | 623                                    | 6                      | 75                                                           | $1.8 \times 10^3$                         | 29        |
| <b>COPV2</b>     | 3.0                         | 379, <u>398</u> , 423                      | <u>436</u> , 461                          | $85 \pm 7$            | 570                 | 423                                  | 2.5                                                                        | 463                                    | 7                      | 55                                                           | $1.2 \times 10^3$                         | 30, 32    |
| <b>COPV2-Tip</b> | 3.8                         | 385, <u>406</u> , 430                      | <u>445</u> , 471                          | $90 \pm 7$            | 580                 | 430                                  | 3.1                                                                        | 474                                    | 8                      | 40                                                           | $\sim 5 \times 10^3$ **                   | 32        |
| <b>COPV3</b>     | 2.0                         | 414, 438, <u>467</u>                       | <u>480</u> , 513                          | 100                   | 650                 | 436                                  | 1.91                                                                       | 515                                    | 8                      | 40                                                           | $6.0 \times 10^3$                         | 30        |
| <b>COPV4</b>     | 5.0                         | 435, 462, <u>495</u>                       | <u>509</u> , 547                          | 100                   | 600                 | 436                                  | 2.4                                                                        | 550                                    | 8                      | 27                                                           | $1.0 \times 10^4$                         | 30        |
| <b>COPV5</b>     | 1.0                         | 450, 479, <u>513</u>                       | <u>526</u> , 566                          | 100                   | 620                 | 532                                  | 0.10                                                                       | 571                                    | 8                      | 550                                                          | $2.2 \times 10^4$                         | 30        |
| <b>COPV6</b>     | 4.0                         | 460, 489, <u>525</u>                       | <u>534</u> , 581                          | 94                    | 770                 | 532                                  | 2.89                                                                       | 584                                    | 8                      | 17                                                           | $2.4 \times 10^4$                         | 30        |
| <b>FZ2</b>       | 1.0                         | 474, 509, <u>545</u>                       | <u>547</u> , 588                          | 73                    | 480                 | 545                                  | 4.40                                                                       | 591                                    | 4                      | 30                                                           | $7.5 \times 10^3$                         | 33        |

\*Measured in solution (Table 1 from the main text)

<sup>b</sup> Peak absorption wavelengths (maximum absorption peak is underlined); <sup>c</sup> Peak photoluminescence wavelengths (maximum photoluminescence peak is underlined); <sup>d</sup> Photoluminescence quantum yield; <sup>e</sup> Film thickness; <sup>f</sup> Pump wavelength; <sup>g</sup> Absorption coefficient at  $\lambda_{\text{p}}$ ; <sup>j</sup> ASE wavelength; <sup>k</sup> ASE linewidth, defined as the full width at half maximum, FWHM, well above the threshold; <sup>m</sup> ASE threshold; <sup>n</sup> ASE operational lifetime, characterized by the photostability half-life  $\tau_{1/2}^{\text{ASE}}$  measured at 10 Hz with a pump intensity of 2500 kW/cm<sup>2</sup> (\*\* Estimated by comparison with COPV2, as it is only measured at 40 kW/cm<sup>2</sup>)

**Table S11.** Optical and ASE properties (left) and geometrical and performance parameters of top-layer resonator distributed feedback (DFB) lasers (right) based on naphthalendiimide and perylenimide derivatives as active media.

| Derivative | Conc. [wt. %] in PS <sup>a</sup> | $\lambda_p^b$ [nm] | $\alpha$ [ $\lambda_p$ ] <sup>c</sup> [ $\times 10^3$ cm <sup>-1</sup> ] | $t_p$ ( $\lambda_p$ ) <sup>d</sup> [ns] | $\lambda_{ASE}^e$ [nm] | FWHM <sup>f</sup> [nm] | $E_{th-ASE}^g$ [mJ/cm <sup>2</sup> ] | $I_{th-ASE}^g$ [kW/cm <sup>2</sup> ] | $\tau_{1/2}^{ASE}$ <sup>i</sup> [pump pulses] | $\Lambda^j$ [nm] | $\lambda_{DFB}^k$ [nm] | $E_{th-ASE}^l$ [mJ/cm <sup>2</sup> ] | $I_{th-ASE}^l$ [kW/cm <sup>2</sup> ] |
|------------|----------------------------------|--------------------|--------------------------------------------------------------------------|-----------------------------------------|------------------------|------------------------|--------------------------------------|--------------------------------------|-----------------------------------------------|------------------|------------------------|--------------------------------------|--------------------------------------|
| <b>NI1</b> | 0.75                             | 450                | 0.67                                                                     | 3.9                                     | 546                    | 16                     | 0.65                                 | 170                                  | $7.3 \times 10^2$                             | 349.5            | 544.3                  | 0.15                                 | 39                                   |
|            |                                  |                    |                                                                          |                                         |                        |                        |                                      |                                      |                                               | <b>350.3</b>     | <b>546.9</b>           | <b>0.14</b>                          | <b>35</b>                            |
|            |                                  |                    |                                                                          |                                         |                        |                        |                                      |                                      |                                               | 352.0            | 548.3                  | 0.15                                 | 39                                   |
|            |                                  |                    |                                                                          |                                         |                        |                        |                                      |                                      |                                               | 353.7            | 550.7                  | 0.15                                 | 39                                   |
| <b>NI2</b> | 0.75                             | 355                | 0.56                                                                     | 5.7                                     | 476                    | 19                     | 5.3                                  | 930                                  | $4.2 \times 10^3$                             | 300.6            | 471.4                  | 20                                   | 3500                                 |
|            |                                  |                    |                                                                          |                                         |                        |                        |                                      |                                      |                                               | 301.8            | 473.2                  | 20                                   | 3500                                 |
|            |                                  |                    |                                                                          |                                         |                        |                        |                                      |                                      |                                               | <b>304.9</b>     | <b>477.0</b>           | <b>17</b>                            | <b>3000</b>                          |
|            |                                  |                    |                                                                          |                                         |                        |                        |                                      |                                      |                                               | 306.7            | 479.1                  | 29                                   | 5100                                 |
| <b>PI1</b> | 0.25                             | 532                | 0.34                                                                     | 5.7                                     | 638                    | 15                     | 0.85                                 | 150                                  | $2.2 \times 10^4$                             | 411.5            | 634.2                  | 0.39                                 | 69                                   |
|            |                                  |                    |                                                                          |                                         |                        |                        |                                      |                                      |                                               | <b>415.2</b>     | <b>638.0</b>           | <b>0.35</b>                          | <b>62</b>                            |
|            |                                  |                    |                                                                          |                                         |                        |                        |                                      |                                      |                                               | 415.7            | 639.9                  | 0.38                                 | 67                                   |
|            |                                  |                    |                                                                          |                                         |                        |                        |                                      |                                      |                                               | 417.7            | 642.7                  | 0.38                                 | 67                                   |
| <b>PI2</b> | 0.50                             | 532                | 0.21                                                                     | 5.7                                     | 598                    | 15                     | 0.45                                 | 80                                   | $2.2 \times 10^4$                             | 384.9            | 596.2                  | 0.31                                 | 54                                   |
|            |                                  |                    |                                                                          |                                         |                        |                        |                                      |                                      |                                               | <b>385.4</b>     | <b>597.5</b>           | <b>0.28</b>                          | <b>49</b>                            |
|            |                                  |                    |                                                                          |                                         |                        |                        |                                      |                                      |                                               | 388.5            | 601.5                  | 0.28                                 | 49                                   |
|            |                                  |                    |                                                                          |                                         |                        |                        |                                      |                                      |                                               | 390.7            | 604.3                  | 0.30                                 | 53                                   |
| <b>PI3</b> | 0.25                             | 532                | 0.27                                                                     | 5.7                                     | 601                    | 14                     | 0.70                                 | 120                                  | $2.2 \times 10^4$                             | 383.5            | 593.5                  | 0.49                                 | 87                                   |
|            |                                  |                    |                                                                          |                                         |                        |                        |                                      |                                      |                                               | 387.7            | 599.4                  | 0.32                                 | 56                                   |
|            |                                  |                    |                                                                          |                                         |                        |                        |                                      |                                      |                                               | <b>389.8</b>     | <b>602.8</b>           | <b>0.34</b>                          | <b>61</b>                            |
|            |                                  |                    |                                                                          |                                         |                        |                        |                                      |                                      |                                               | 391.5            | 605.4                  | 0.31                                 | 55                                   |

<sup>a</sup> Error ~0.1%; <sup>b</sup> Pump wavelength; <sup>c</sup> Absorption coefficient at  $\lambda_p$  (error ~2%); <sup>d</sup> Pump pulse width at  $\lambda_p$ ; <sup>e</sup> ASE wavelength (error is  $\pm 0.5$  nm); <sup>f</sup> ASE linewidth (error is  $\pm 2$  nm), defined as the full width at half maximum, FWHM, well above the threshold; <sup>g</sup> ASE threshold (error ~20%); <sup>i</sup> ASE operational lifetime, characterized by the photostability half-life  $\tau_{1/2}^{ASE}$  (determined from Fig. 4c) measured at 10 Hz with a pump intensity of 2500 kW/cm<sup>2</sup> (error 10%); <sup>j</sup> Grating period (error ~0.5%); <sup>k</sup> DFB wavelength (error is  $\pm 0.5$  nm); <sup>l</sup> DFB threshold (error ~10%)

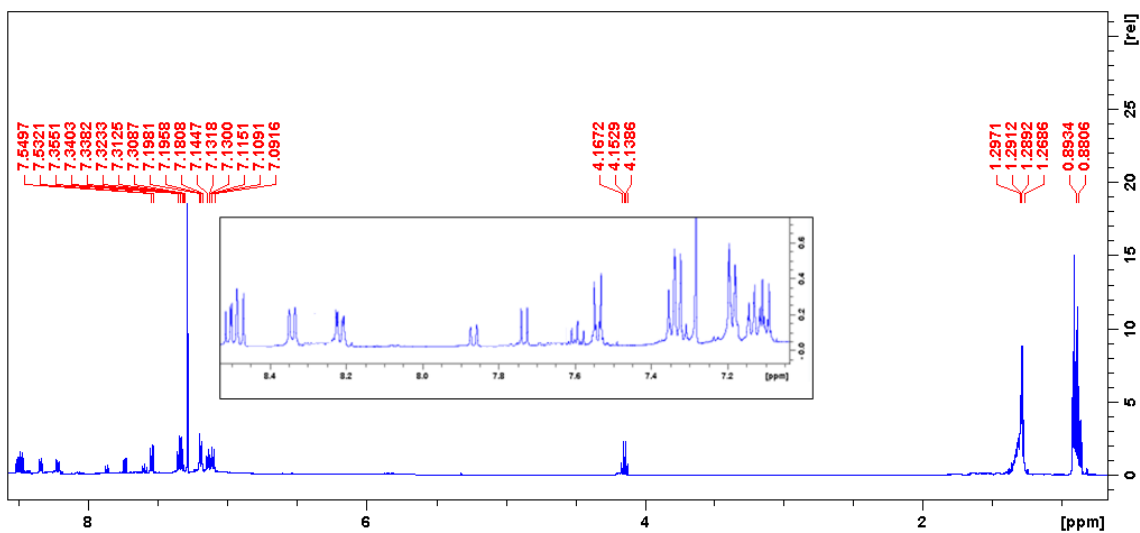

Fig. S7.  $^1\text{H-NMR}$  spectrum (500 MHz,  $\text{CDCl}_3$ ) of derivative PI1

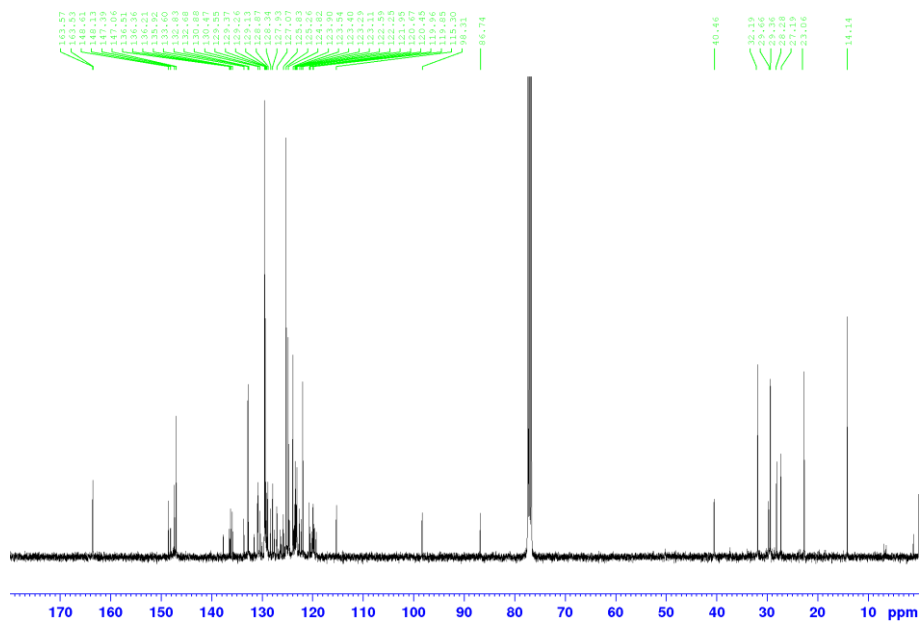

Fig. S8.  $^{13}\text{C-NMR}$  spectrum (125 MHz,  $\text{CDCl}_3$ ) of derivative PI1

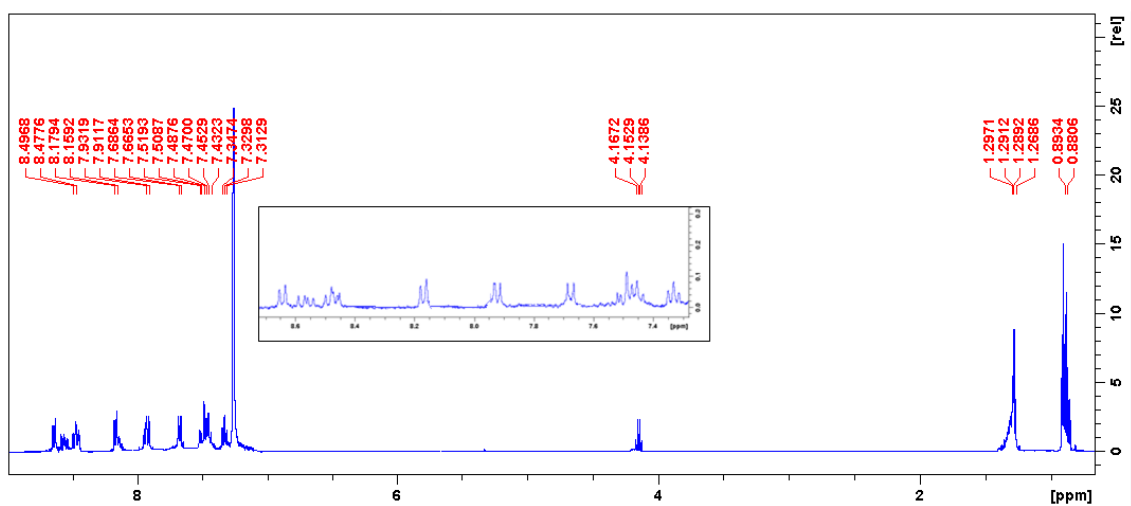

Fig. S9.  $^1\text{H}$ -NMR spectrum (500 MHz,  $\text{CDCl}_3$ ) of derivative **PI2**

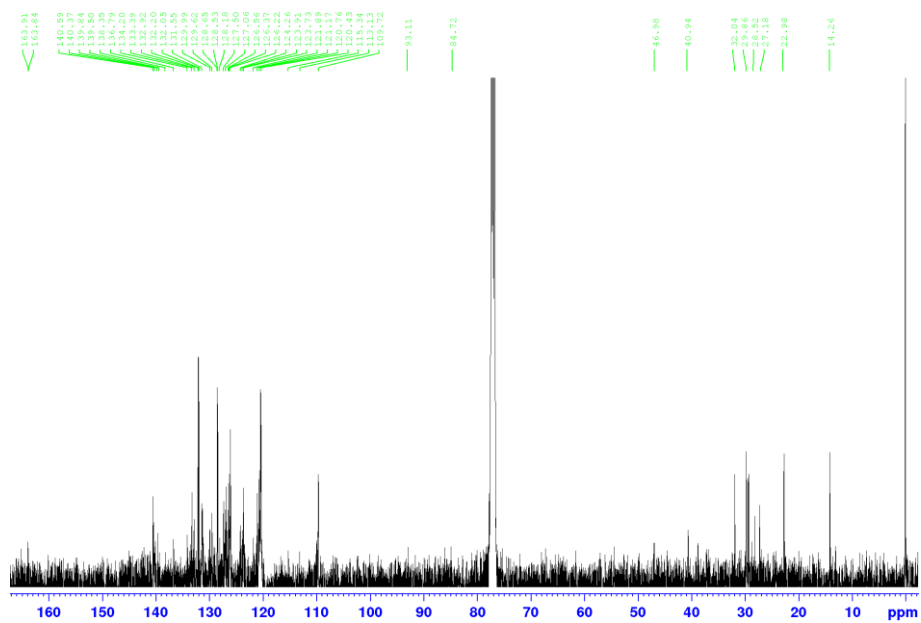

Fig. S10.  $^{13}\text{C}$ -NMR spectrum (125 MHz,  $\text{CDCl}_3$ ) of derivative **PI2**

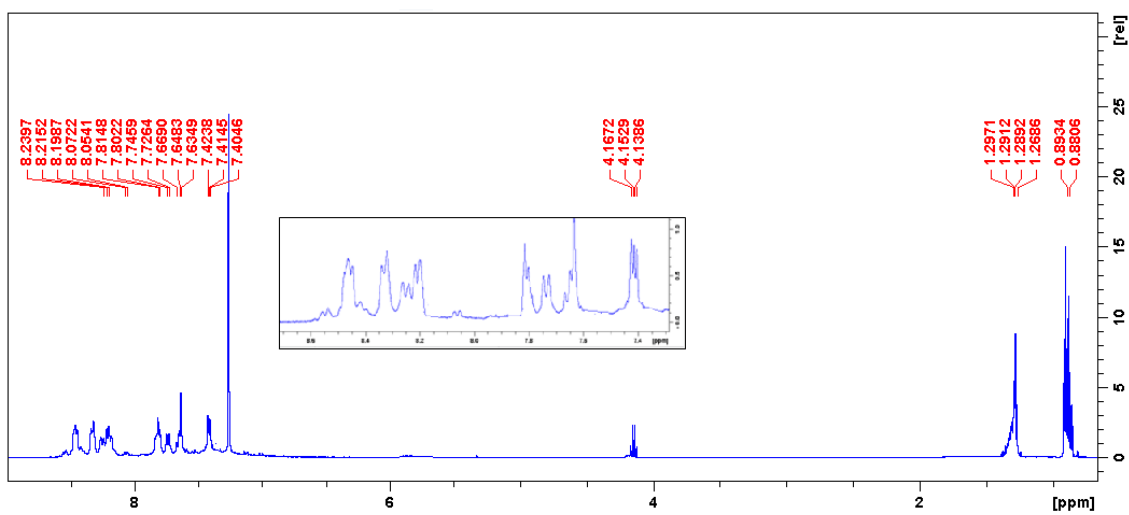

Fig. S11.  $^1\text{H}$ -NMR spectrum (500 MHz,  $\text{CDCl}_3$ ) of derivative PI3

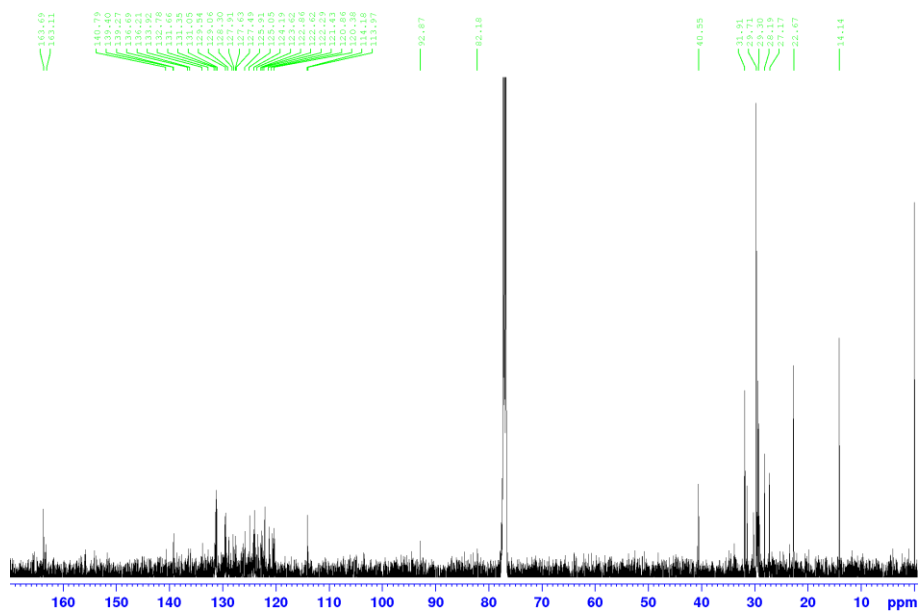

Fig. S12.  $^{13}\text{C}$ -NMR spectrum (125 MHz,  $\text{CDCl}_3$ ) of derivative PI3
